# Supplementary material for: Proteomic Screening for Amyloid Proteins
Source: PubMed Central journal article supplement (PMC4280166; doi:10.1371/journal.pone.0116003), 2014-12-30
Supplement: pone.0116003.s001.pdf [file pone.0116003.s001.pdf]

**Table S1.** Identification data of the proteins listed in Table 1.

**Ape1**

**Mass-spectrum:**

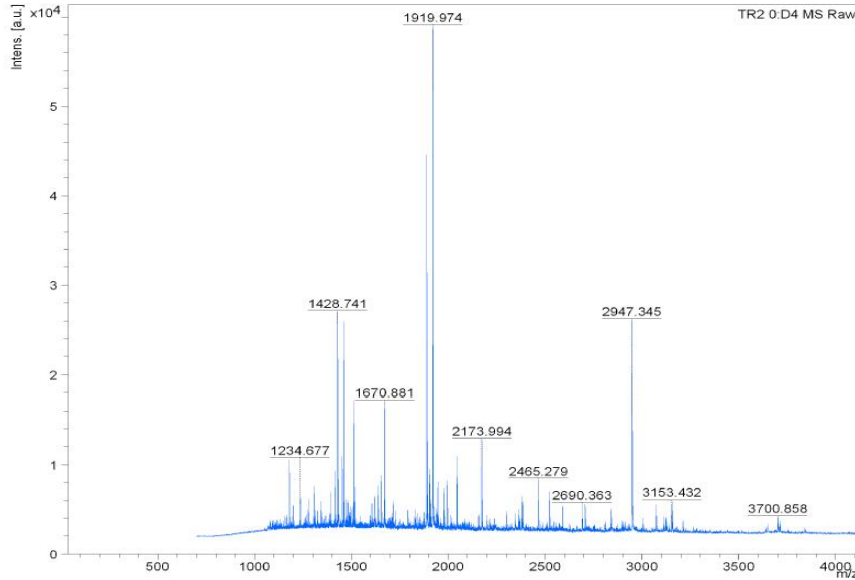

**Identification:**

[gi|6322746](#) Mass: 57057 Score: 70 Expect: 0.00084

Matches: 14

Start-EndObservedMr (expt)Mr (calc)ppm MPeptide 34-623647.61403646.60683646.6925-23.52K.EKKENENSWCILEHNYEDIAQEFIDFIYK.N 89-1011392.59931391.59211391.5953-2.360K.SNWQDSIGEDGGK.F 107-1181234.67701233.66971233.6717-1.610R.NGTNLSAFILGK.N 125-1391451.81291450.80561450.8144-6.050K.GVGVIGSHVDALTVK.L 155-1711887.98201886.97481886.9890-7.570R.IAVAPYGGTLELWLDLDR.D 191-2031414.72431413.71701413.7286-8.190K.SALVDSTPLPVC.R.I + Carbamidomethyl (C) 204-2211907.97741906.97011906.9941-12.60R.IPSLAPHFGKPAEGPFDK.E 266-2862362.19712361.18982361.2138-10.10K.LAGVEVSELIQMDLDFDVQK.G 266-2862378.19992377.19262377.2087-6.770K.LAGVEVSELIQMDLDFDVQK.G + Oxidation (M)

Start-EndObservedMr (expt)Mr (calc)ppm MPeptide 302-3202173.99442172.98712173.0733-39.71R.LDDRLLCSFAAMIALICYAK.D + Carbamidomethyl (C) 321-3462947.34472946.33752946.3618-8.260K.DVNTEESDLFSTVTLVDNEEIGSLTR.Q 452-4671459.73751458.73021458.7427-8.530R.SGGTIGPPLASQTGAR.T 468-4821654.87931653.87201653.8872-9.190R.TIDLGLIAQLSMHSIR.A 468-4821670.88101669.87371669.8821-5.040R.TIDLGLIAQLSMHSIR.A + Oxidation (M)

No match to: 1080.4900, 1093.5298, 1107.5346, 1134.6055, 1148.6715, 1157.5842, 1194.5870, 1201.6817, 1235.5134, 1235.6625, 1265.6320, 1273.6445, 1302.6991, 1311.6604, 1323.6909, 1340.6796, 1346.3023, 1365.6458, 1428.7412, 1434.7418, 1479.7549, 1485.7632, 1489.7369, 1491.7273, 1493.7094, 1496.7688, 1507.7355, 1510.7271, 1516.7542, 1595.8165, 1606.8789, 1618.2236, 1636.6241, 1707.7649, 1727.8935, 1826.8836, 1837.9352, 1851.9083, 1874.9528, 1891.9788, 1902.9665, 1904.9877, 1919.9737, 1935.9741, 1945.0007, 1976.9935, 2013.8892, 2045.8709, 2156.9911, 2195.9852, 2239.1189, 2299.8872, 2346.1122, 2522.3036, 2588.3215, 2690.3629, 2808.2913, 2840.2859, 2902.3547, 3004.3641, 3073.2506, 3112.5430, 3122.4456, 3153.4316, 3156.4217, 3210.4479, 3700.8584, 3710.6574

# Ape4

## Mass-spectrum:

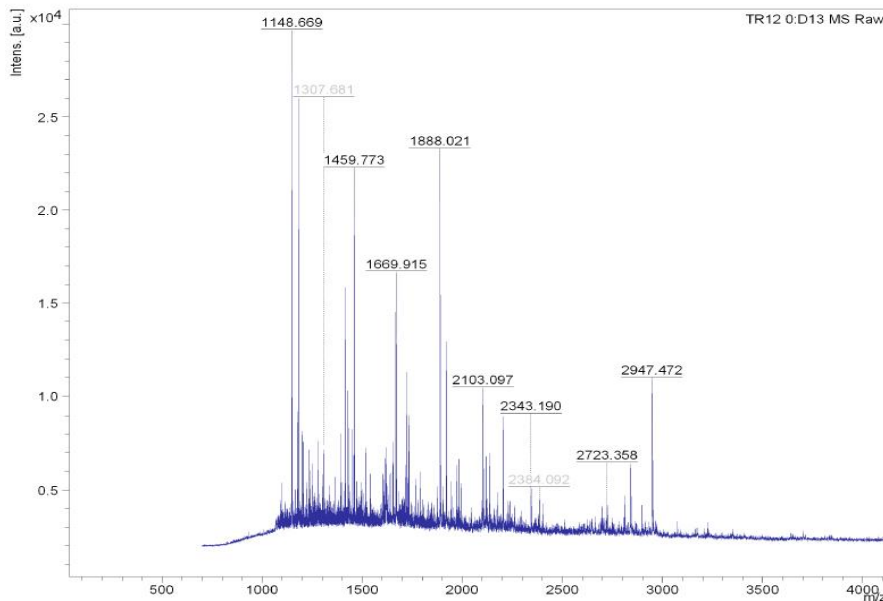

## Identification:

[gi|151944059](#) Mass: 54140 Score: 99 Expect: 1e-006  
Matches: 15

Start-EndObservedMr (expt)Mr (calc)ppm MPeptide 21-  
402343.19032342.18312342.144416.50K.EFVSFLNSSHSPYHTVHNIK.K 55-  
641098.53531097.52801097.52542.400R.DSWAGHVAQK.G 85-  
1042103.09652102.08922102.054516.50K.WEPGNPIAITGAHTDSPALR.I 157-  
1661180.73261179.72541179.7339-7.240R.LVDLNRPLLK.I 167-  
1761148.66941147.66211147.6713-8.040K.IPTLAIHLDR.D 167-  
1811733.00091731.99371731.963217.61K.IPTLAIHLDRDQVNF.F 187-  
2001540.85491539.84761539.814421.50R.ETQLLPIGGLQEDK.T

Start-EndObservedMr (expt)Mr (calc)ppm MPeptide 187-  
2041970.12551969.11821969.036841.41R.ETQLLPIGGLQEDKTEAK.T 208-  
2181251.62211250.61481250.61430.420K.EINNGEFTSIK.T 224-  
2341201.69251200.68521200.6979-10.60R.HHAELLGLIAK.E 335-  
3552202.19792201.19062201.096442.80K.GDGSQTKPLFHSAILLETSK.S 375-  
3901722.99441721.98711721.946423.60K.YESQHKPLLGGGPVIK.I 397-  
4081337.72351336.71621336.70617.590R.YMTNSPGLVIVK.R + Oxidation (M) 460-  
4721394.69701393.68971393.672512.40R.ETGGSADLEFQIK.L 473-  
4801115.58151114.57421114.5811-6.201K.LFKEFFER.Y

No match to: 1093.5318, 1102.5721, 1157.5937, 1174.6564, 1205.6884,  
1221.6514, 1233.6414, 1235.6669, 1237.7508, 1263.6802, 1284.6829,  
1365.6711, 1392.6561, 1414.7490, 1428.7730, 1434.7555, 1451.8451,  
1459.7732, 1471.7849, 1486.8021, 1492.7765, 1496.7841, 1507.7814,  
1516.8057, 1604.9002, 1606.8982, 1617.1755, 1618.2755, 1639.9103,  
1653.9077, 1669.9151, 1671.9310, 1684.8978, 1727.9318, 1765.8105,  
1873.0239, 1888.0212, 1904.0162, 1920.0167, 1945.0438, 1983.1290,  
2119.0979, 2135.1014, 2723.3577, 2808.4010, 2839.3768, 2896.4312, 2947.4721

# Gas1

## Mass-spectrum:

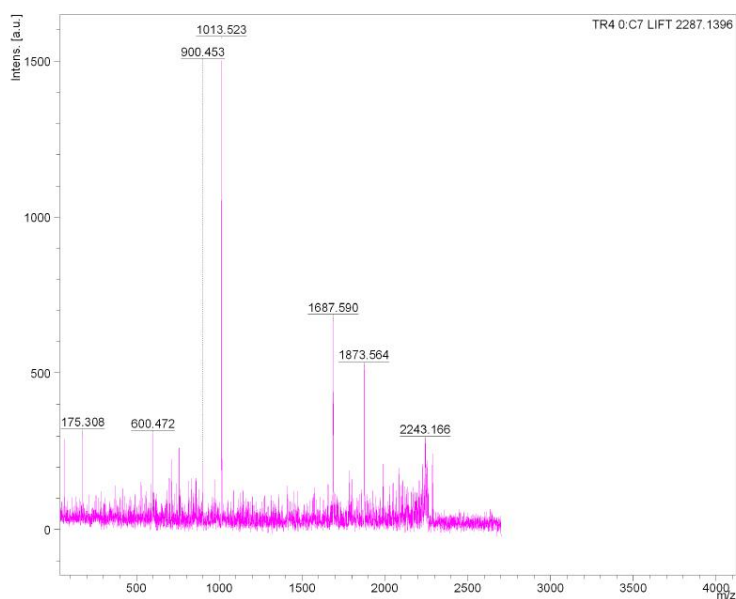

## Identification (MS/MS):

[gi|207342034](#) Mass: 59545 Score: 45 Match: 1

| QueryStart-End | ObservedMr (expt) | Mr (calc)                  | ppm      | MScore | Expect | Rank |
|----------------|-------------------|----------------------------|----------|--------|--------|------|
| 1106-1272      | 287.1396          | 2286.1323                  | 286.1855 | -      |        |      |
| 23.30450       | .000471           | UK.ALNDADIYVIADLAAPATSINR. |          |        |        |      |

# Rnq1

## Mass-spectrum:

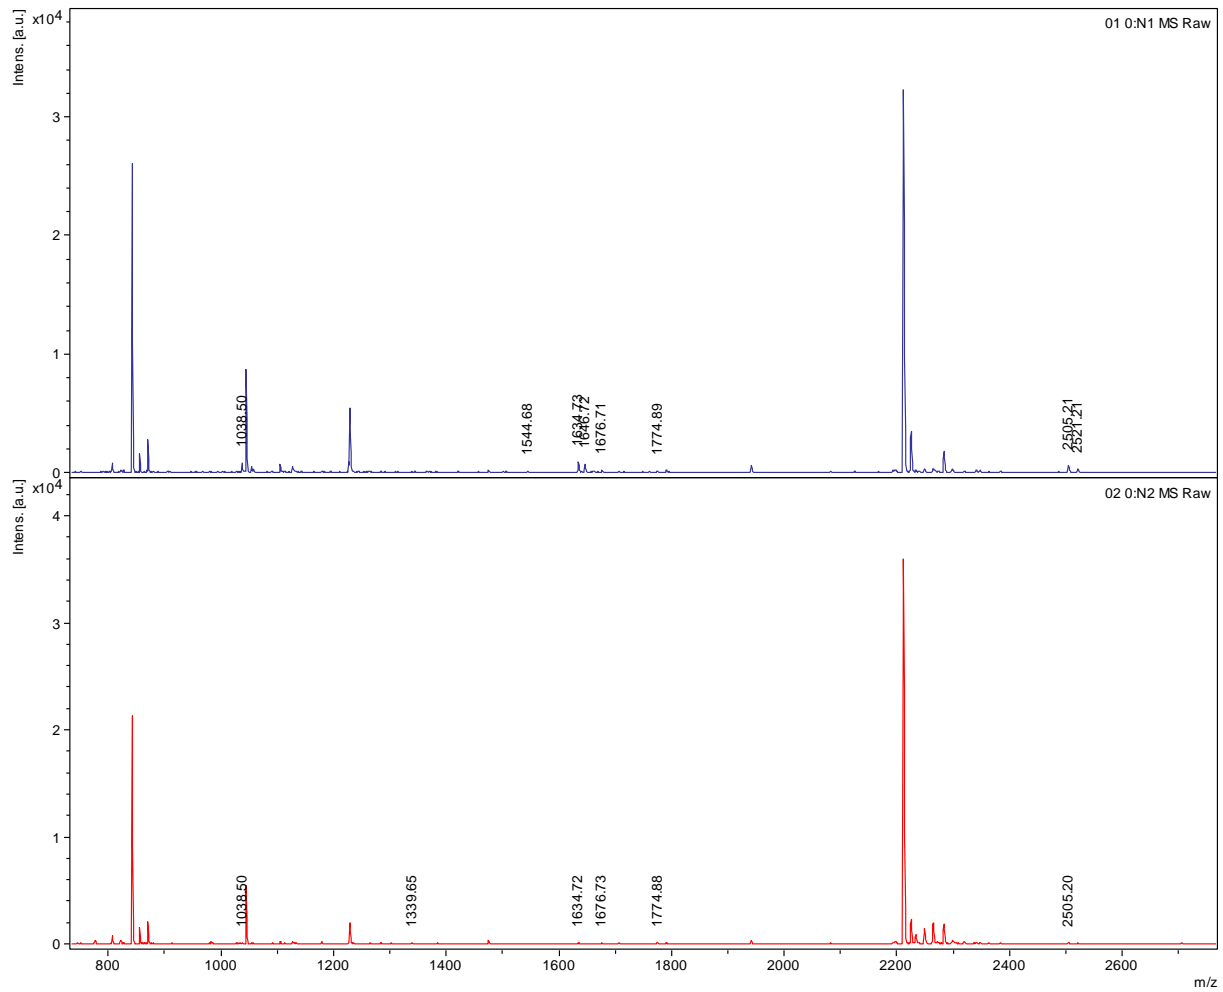

## Identification:

[gi|323305878](#) Mass: 23864 Score: 191 Expect: 1.4e-12 Matches: 5

Rnq1p [Saccharomyces cerevisiae FostersB]

| Observed  | Mr(expt)  | Mr(calc)  | ppm   | Start | End | Miss | Ions | Peptide                                     |
|-----------|-----------|-----------|-------|-------|-----|------|------|---------------------------------------------|
| 1038.4986 | 1037.4913 | 1037.4964 | -4.90 | 49    | 57  | 0    | 18   | K.IAGYVMDNR.S                               |
| 1660.7461 | 1659.7388 | 1659.7233 | 9.35  | 68    | 84  | 0    | ---  | R.AAGGSSFMNLMADSK.G + Oxidation (M)         |
| 1676.7137 | 1675.7064 | 1675.7182 | -7.02 | 68    | 84  | 0    | ---  | R.AAGGSSFMNLMADSK.G + 2 Oxidation (M)       |
| 2505.2134 | 2504.2061 | 2504.2064 | -0.12 | 26    | 48  | 0    | 136  | K.LTSAAQSNPNDEQMSTIESLIQK.I                 |
| 2521.2091 | 2520.2018 | 2520.2013 | 0.20  | 26    | 48  | 0    | ---  | K.LTSAAQSNPNDEQMSTIESLIQK.I + Oxidation (M) |

No match to: 1544.6808, 1633.7481, 1634.7260, 1645.7180, 1646.7205, 1774.8912
