# Supplementary material for: Proteomic Screening for Amyloid Proteins
Source: PubMed Central journal article supplement (PMC4280166; doi:10.1371/journal.pone.0116003), 2014-12-30
Supplement: pone.0116003.s002.pdf [file pone.0116003.s002.pdf]

**Table S2.** Identification data of the proteins listed in Table 2.

## A $\beta$ -GFP

Mass-spectrum (MS/MS):

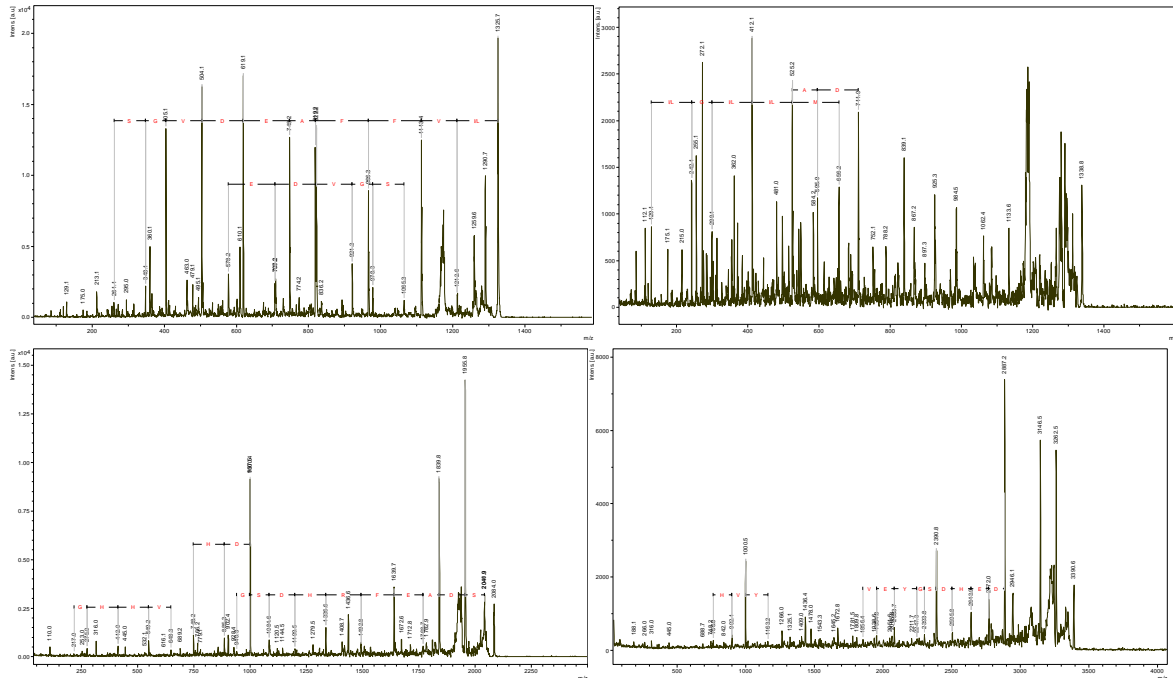

**Identification:**

[gi|253723204](#) **Mass:** 2176 **Score:** 137 **Matches:** 1 (1) **Sequences:** 1 (1)  
Chain A, Zinc-Binding Domain Of Alzheimer's Disease Amyloid Beta- Peptide In Water Solution At Ph 6.5

| Query              | Observed  | Mr (expt) | Mr (calc) | ppm  | Miss | Score | Expect | Rank | Unique | Peptide                                         |
|--------------------|-----------|-----------|-----------|------|------|-------|--------|------|--------|-------------------------------------------------|
| <a href="#">19</a> | 2083.9300 | 2082.9227 | 2082.9144 | 3.99 | 1    | 143   | 9e-11  | 1    | U      | -_SDAEFRHDSGYEVHHQK.X + Acetyl (Protein N-term) |

[gi|177958](#) **Mass:** 3429 **Score:** 98 **Matches:** 1 (1) **Sequences:** 1 (1)  
amyloid beta protein, partial [Homo sapiens]

| Query             | Observed  | Mr (expt) | Mr (calc) | ppm  | Miss | Score | Expect  | Rank | Unique | Peptide          |
|-------------------|-----------|-----------|-----------|------|------|-------|---------|------|--------|------------------|
| <a href="#">8</a> | 1325.6741 | 1324.6668 | 1324.6663 | 0.39 | 0    | 98    | 5.5e-06 | 1    | U      | K.LVFFAEDVGSNK.G |

# PrP-GFP

## Mass-spectrum:

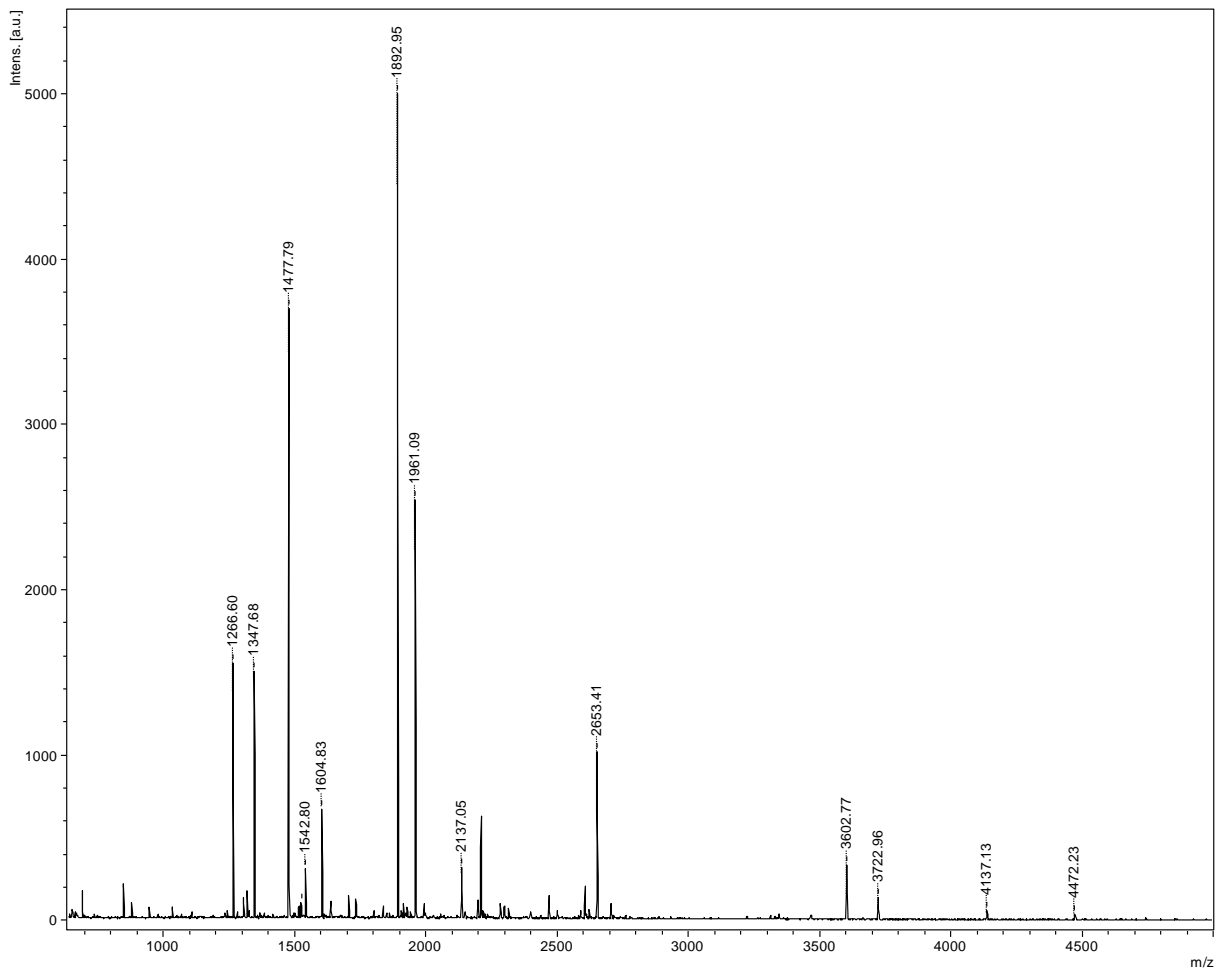

## Identification:

[gi|240104235](https://pubmed.ncbi.nlm.nih.gov/240104235/)

Mass: 13201

Score: 310

Expect: 2.7e-24

Matches: 4

Chain A, Mouse Prion Protein (121-231) With Mutations Y225a And Y226a

| Observed  | Mr(expt)  | Mr(calc)  | ppm  | Start | End | Miss | Ions | Peptide                                              |
|-----------|-----------|-----------|------|-------|-----|------|------|------------------------------------------------------|
| 1526.7422 | 1525.7350 | 1525.7269 | 5.30 | 91    | 102 | 0    | 82   | R.VVEQMCVTQYQK.E + Propionamide (C)                  |
| 1542.7988 | 1541.7915 | 1541.7218 | 45.2 | 91    | 102 | 0    | ---  | R.VVEQMCVTQYQK.E + Oxidation (M); Propionamide (C)   |
| 2137.0502 | 2136.0430 | 2136.0335 | 4.42 | 68    | 86  | 1    | 141  | K.QHIVTTTIKGENFTETDVK.M                              |
| 3602.7692 | 3601.7619 | 3601.7048 | 15.8 | 39    | 67  | 0    | 45   | R.YPNQVYYRPVDQYSNQNNFVHDCVNITIK.Q + Propionamide (C) |

No match to: 1266.5968, 1347.6805, 1477.7942, 1604.8267, 1892.9471, 1961.0884, 2653.4058, 3722.9558, 4137.1268, 4472.2296

# Rnq1

## Mass-spectrum:

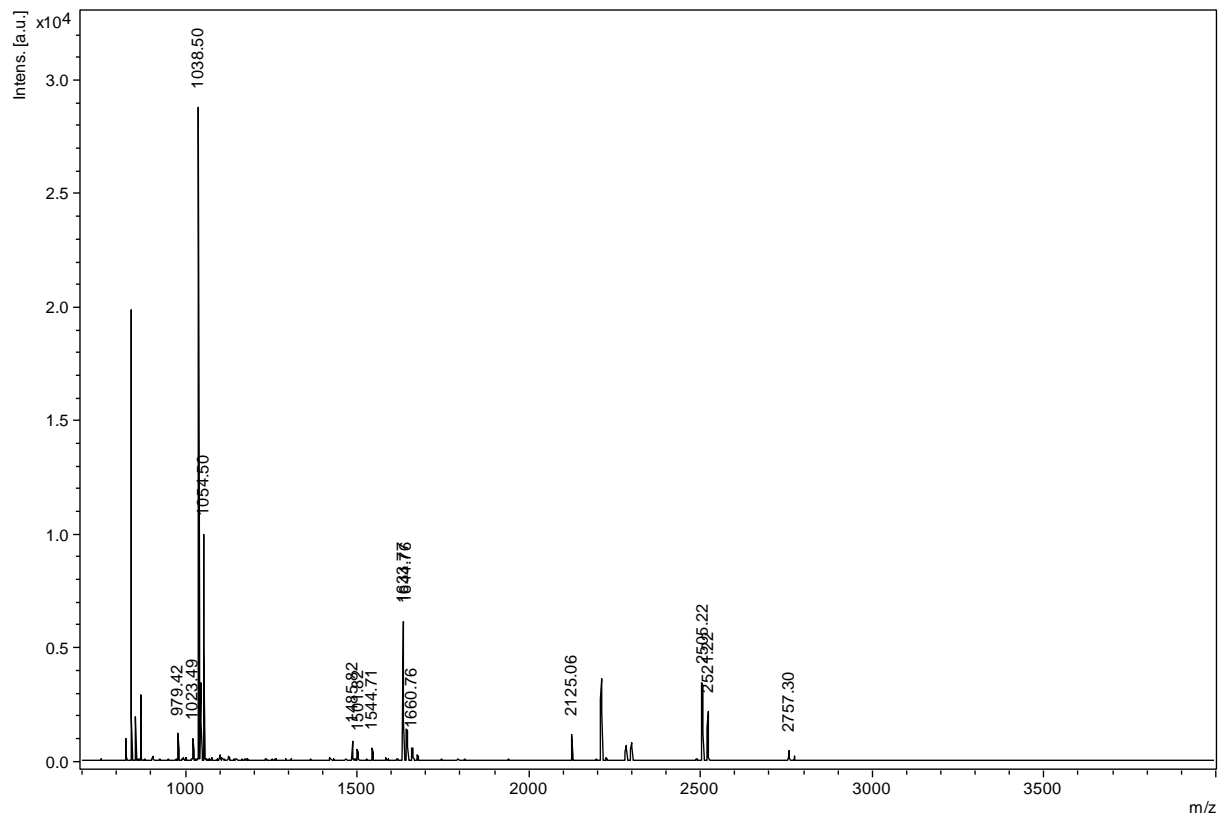

## Identification:

[gi|408368764](https://www.ncbi.nlm.nih.gov/nuclot/408368764)

Mass: 18836

Score: 94

Expect: 0.0091

Matches: 10

truncated Rnq1p [*Saccharomyces cerevisiae*]

| Observed  | Mr (expt) | Mr (calc) | ppm   | Start | End | Miss | Peptide                                     |
|-----------|-----------|-----------|-------|-------|-----|------|---------------------------------------------|
| 979.4196  | 978.4123  | 978.4003  | 12.3  | 58    | 67  | 0    | R.SGGSDASQDR.A                              |
| 1038.5017 | 1037.4944 | 1037.4964 | -1.90 | 49    | 57  | 0    | K.IAGYVMDNR.S                               |
| 1054.5032 | 1053.4959 | 1053.4913 | 4.39  | 49    | 57  | 0    | K.IAGYVMDNR.S + Oxidation (M)               |
| 1485.8229 | 1484.8156 | 1484.8021 | 9.11  | 94    | 107 | 0    | K.LALLATVMTHSSNK.G                          |
| 1501.8173 | 1500.8100 | 1500.7970 | 8.67  | 94    | 107 | 0    | K.LALLATVMTHSSNK.G + Oxidation (M)          |
| 1644.7597 | 1643.7525 | 1643.7283 | 14.7  | 68    | 84  | 0    | R.AAGGGSSFMNLMADSK.G                        |
| 1660.7558 | 1659.7485 | 1659.7233 | 15.2  | 68    | 84  | 0    | R.AAGGGSSFMNLMADSK.G + Oxidation (M)        |
| 2125.0618 | 2124.0546 | 2124.0236 | 14.6  | 6     | 25  | 0    | K.LISEAESHFSQGNHAEVAK.L                     |
| 2505.2183 | 2504.2110 | 2504.2064 | 1.85  | 26    | 48  | 0    | K.LTSAAQSNPNDEQMSTIESLIQK.I                 |
| 2521.2183 | 2520.2111 | 2520.2013 | 3.86  | 26    | 48  | 0    | K.LTSAAQSNPNDEQMSTIESLIQK.I + Oxidation (M) |

No match to: 1023.4878, 1544.7086, 1633.7660, 2757.2960
