# Supplementary material for: Proteomic Screening for Amyloid Proteins
Source: PubMed Central journal article supplement (PMC4280166; doi:10.1371/journal.pone.0116003), 2014-12-30
Supplement: pone.0116003.s003.pdf [file pone.0116003.s003.pdf]

**Table S3.** Identification data of the proteins listed in Table 3.

## Ape1

### Mass-spectrum:

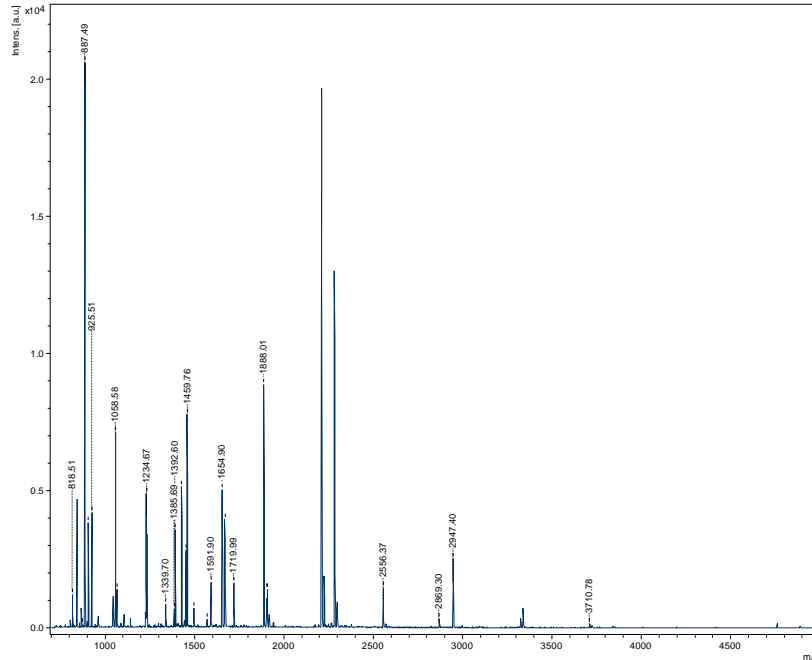

### Identification:

[gi|6322746](#) **Mass:** 57057 **Score:** 275 **Expect:** 5.7e-21 **Matches:** 21

Lap4p [*Saccharomyces cerevisiae* S288c]

| Observed  | Mr (expt) | Mr (calc) | ppm   | Start | End   | Miss | Peptide                               |
|-----------|-----------|-----------|-------|-------|-------|------|---------------------------------------|
| 818.5140  | 817.5068  | 817.5062  | 0.74  | 140   | - 146 | 0    | K.LKPVSEFK.D                          |
| 887.4889  | 886.4816  | 886.4814  | 0.31  | 295   | - 301 | 0    | K.HFLFAPR.L                           |
| 906.4482  | 905.4410  | 905.4436  | -2.91 | 496   | - 502 | 0    | K.FFNGFFK.H                           |
| 925.5115  | 924.5042  | 924.5069  | -2.90 | 441   | - 447 | 0    | K.VQYFQIK.N                           |
| 1058.5822 | 1057.5750 | 1057.5768 | -1.71 | 351   | - 360 | 0    | K.GLLESVVER.S                         |
| 1234.6698 | 1233.6626 | 1233.6717 | -7.42 | 107   | - 118 | 0    | R.NGTNLSAFILGK.N                      |
| 1339.6973 | 1338.6901 | 1338.6932 | -2.33 | 437   | - 447 | 1    | R.NGDKVQYFQIK.N                       |
| 1385.6914 | 1384.6841 | 1384.6829 | 0.85  | 496   | - 505 | 1    | K.FFNGFFKHW.R.S                       |
| 1392.6030 | 1391.5957 | 1391.5953 | 0.25  | 89    | - 101 | 0    | K.SNWQDSIGEDGGK.F                     |
| 1428.7557 | 1427.7485 | 1427.7442 | 2.96  | 191   | - 203 | 0    | K.SALVDSTPLPVC.R.I + Propionamide (C) |
| 1451.8213 | 1450.8141 | 1450.8144 | -0.24 | 125   | - 139 | 0    | K.GVGVIGSHVDALTVK.L                   |
| 1459.7629 | 1458.7556 | 1458.7427 | 8.87  | 452   | - 467 | 0    | R.SGGTIGPSLASQTGAR.T                  |
| 1570.8926 | 1569.8853 | 1569.8780 | 4.65  | 287   | - 301 | 1    | K.GTIGGIGKHFLFAPR.L                   |
| 1591.8971 | 1590.8898 | 1590.8817 | 5.13  | 249   | - 261 | 1    | K.SPLFGKHCIIHLR.Y + Propionamide (C)  |
| 1654.9042 | 1653.8970 | 1653.8872 | 5.89  | 468   | - 482 | 0    | R.TIDLGIAQLSMHSIR.A                   |
| 1670.8941 | 1669.8868 | 1669.8821 | 2.79  | 468   | - 482 | 0    | R.TIDLGIAQLSMHSIR.A + Oxidation (M)   |
| 1888.0082 | 1887.0009 | 1886.9890 | 6.28  | 155   | - 171 | 0    | R.IAVAPYGGTILNELWLD.R.D               |
| 1908.0048 | 1906.9975 | 1906.9941 | 1.78  | 204   | - 221 | 0    | R.IPSLAPHFGKPAEGPFDK.E                |
| 2556.3653 | 2555.3580 | 2555.3496 | 3.30  | 155   | - 178 | 1    | R.IAVAPYGGTILNELWLD.R.LGIGGR.L        |
| 2869.2972 | 2868.2899 | 2868.2825 | 2.58  | 222   | - 247 | 0    | K.EDQIIPVIGFPTPDEEGNEPPTDDEK.K        |
| 2947.3981 | 2946.3908 | 2946.3618 | 9.85  | 321   | - 346 | 0    | K.DVNTTEESDLFSTVTILYDNEEIGSLTR.Q      |

No match to: 1066.5976, 1496.7924, 1719.9930, 1904.0052, 3710.7825

# Ape4

## Mass-spectrum:

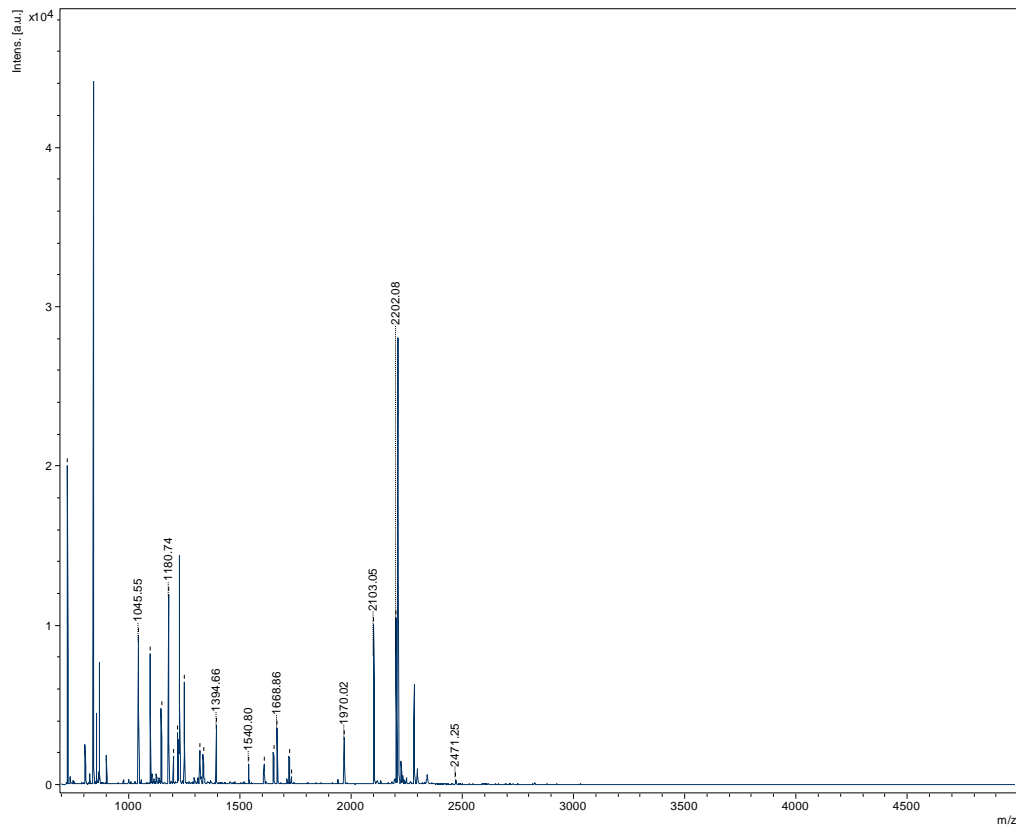

## Identification:

[gi|323308744](https://pubmed.ncbi.nlm.nih.gov/323308744/)

Mass: 53064

Score: 277

Expect: 3.6e-21

Matches: 20

YHR113W-like protein [Saccharomyces cerevisiae FostersO]

| Observed  | Mr (expt) | Mr (calc) | ppm    | Start | End | Miss | Peptide                             |
|-----------|-----------|-----------|--------|-------|-----|------|-------------------------------------|
| 727.3534  | 726.3461  | 726.3337  | 17.1   | 468   | 472 | 0    | K.EFFER.Y                           |
| 1098.5154 | 1097.5081 | 1097.5254 | -15.79 | 47    | 56  | 0    | R.DSWAGHVAQK.G                      |
| 1148.6728 | 1147.6655 | 1147.6713 | -5.06  | 159   | 168 | 0    | K.IPTLAIHLDR.D                      |
| 1180.7408 | 1179.7335 | 1179.7339 | -0.35  | 149   | 158 | 0    | R.LVDLNRPLLK.I                      |
| 1201.6905 | 1200.6832 | 1200.6979 | -12.18 | 216   | 226 | 0    | R.HHAELLGLIAK.E                     |
| 1220.6387 | 1219.6314 | 1219.6561 | -20.25 | 64    | 76  | 0    | R.NGSSIIAFVGGK.W                    |
| 1251.6127 | 1250.6054 | 1250.6143 | -7.05  | 200   | 210 | 0    | K.EINNGEFTSIK.A                     |
| 1321.7006 | 1320.6933 | 1320.7112 | -13.49 | 389   | 400 | 0    | R.YMTNSPGLVLVK.R                    |
| 1337.6902 | 1336.6829 | 1336.7061 | -17.33 | 389   | 400 | 0    | R.YMTNSPGLVLVK.R + Oxidation (M)    |
| 1394.6616 | 1393.6543 | 1393.6725 | -13.08 | 452   | 464 | 0    | R.ETGGSADLEFQIK.L                   |
| 1540.8023 | 1539.7950 | 1539.8144 | -12.59 | 179   | 192 | 0    | R.ETQLLPIGGLQEDK.T                  |
| 1609.7817 | 1608.7744 | 1608.7995 | -15.60 | 197   | 210 | 1    | K.TEKEINNGEFTSIK.A                  |
| 1652.8679 | 1651.8606 | 1651.8716 | -6.62  | 437   | 451 | 0    | R.TLDLGNPVLMSHSIR.E                 |
| 1668.8605 | 1667.8533 | 1667.8665 | -7.93  | 437   | 451 | 0    | R.TLDLGNPVLMSHSIR.E + Oxidation (M) |
| 1722.9360 | 1721.9287 | 1721.9464 | -10.31 | 367   | 382 | 0    | K.YESQHKPLGGGPVIK.I                 |
| 1732.9622 | 1731.9550 | 1731.9632 | -4.73  | 159   | 173 | 1    | K.IPTLAIHLDRDVKQK.F                 |
| 1970.0244 | 1969.0171 | 1969.0368 | -9.99  | 179   | 196 | 1    | R.ETQLLPIGGLQEDKTEAK.T              |
| 2103.0450 | 2102.0378 | 2102.0545 | -7.96  | 77    | 96  | 0    | K.WEPGNPIAITGAHTDSPALR.I            |
| 2202.0842 | 2201.0769 | 2201.0964 | -8.88  | 327   | 347 | 0    | K.GDGSQTKPLFHSAILLETSK.S            |
| 2471.2462 | 2470.2389 | 2470.2393 | -0.16  | 13    | 33  | 1    | K.EFVSVLNSHSPYHTVHNIKK.H            |

No match to: 1045.5548

# Gas1

## Mass-spectrum:

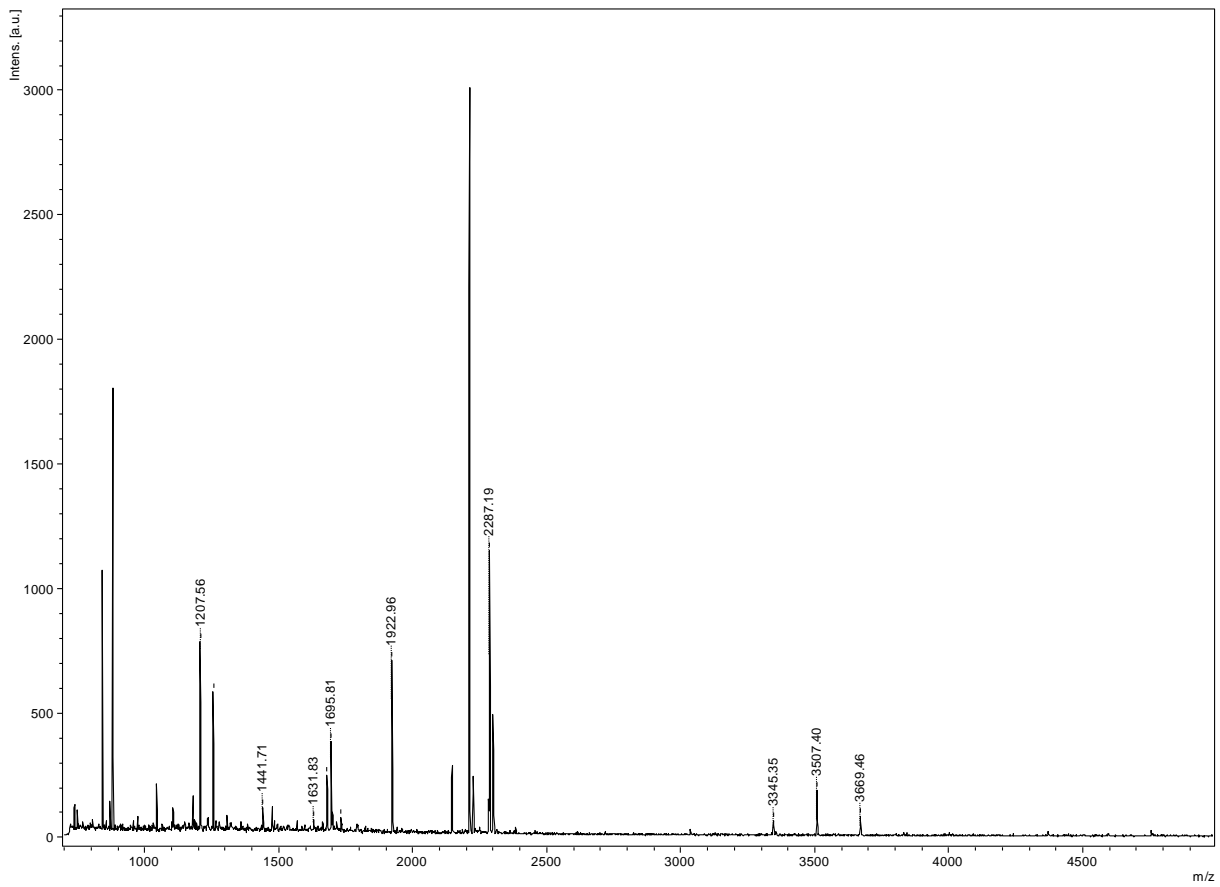

## Identification:

[gi|207342034](#)

Mass: 48341

Score: 203

Expect: 1e-13

Matches: 4

YMR307Wp-like protein [*Saccharomyces cerevisiae* AWRI1631]

| Observed  | Mr(expt)  | Mr(calc)  | ppm   | Start | End | Miss | Ions | Peptide                           |
|-----------|-----------|-----------|-------|-------|-----|------|------|-----------------------------------|
| 1207.5574 | 1206.5501 | 1206.5379 | 10.1  | 312   | 321 | 0    | 48   | K.YGAYSFCTPK.E + Propionamide (C) |
| 1679.8047 | 1678.7974 | 1678.7912 | 3.67  | 322   | 334 | 0    | 46   | K.EQLSFVMNLYYEK.S + Oxidation (M) |
| 1695.8069 | 1694.7996 | 1694.7748 | 14.6  | 90    | 104 | 1    | ---  | R.KIPVGYSSNDEDEDTR.V              |
| 2287.1896 | 2286.1824 | 2286.1855 | -1.39 | 3     | 24  | 0    | 69   | K.ALNDADIYVIADLAAPATSINR.D        |

No match to: 1255.6590, 1441.7122, 1631.8298, 1732.7874, 1922.9551, 3345.3503, 3507.3990, 3669.4629

# Pre1

## Mass-spectrum:

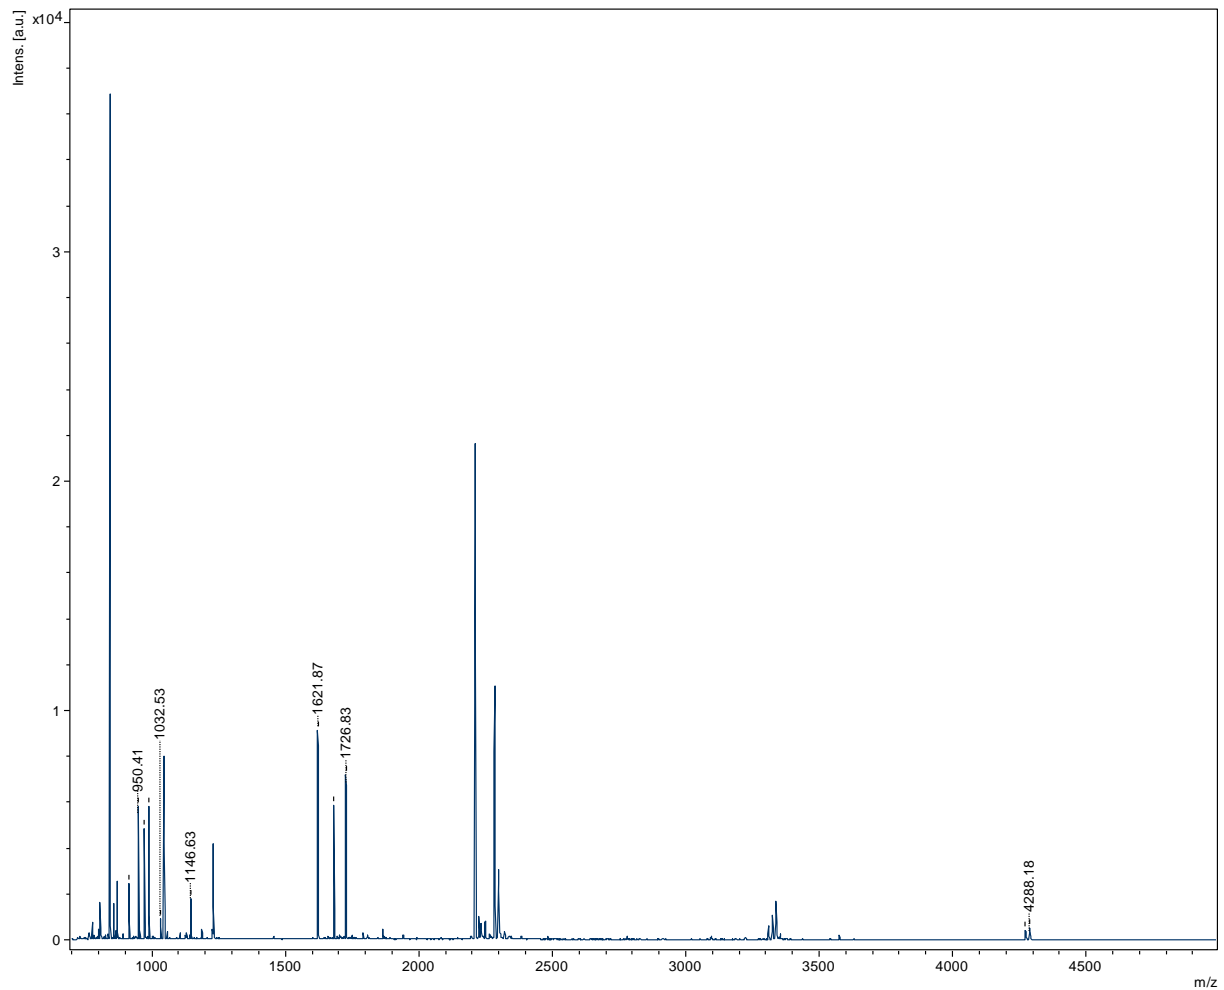

## Identification:

[gi|6320849](#) **Mass:** 22503 **Score:** 145 **Expect:** 5.7e-08 **Matches:** 9

Pre1p [Saccharomyces cerevisiae S288c]

| Observed  | Mr (expt) | Mr (calc) | ppm    | Start | End   | Miss | Peptide                                                 |
|-----------|-----------|-----------|--------|-------|-------|------|---------------------------------------------------------|
| 915.5216  | 914.5143  | 914.5185  | -4.62  | 183   | - 190 | 1    | K.IVDKDGIR.Q                                            |
| 950.4120  | 949.4047  | 949.4141  | -9.92  | 191   | - 198 | 0    | R.QVDDFQAQ.-                                            |
| 1032.5271 | 1031.5198 | 1031.5321 | -11.91 | 163   | - 170 | 0    | K.LCVQELEK.R + Propionamide (C)                         |
| 1146.6278 | 1145.6205 | 1145.6292 | -7.61  | 9     | - 19  | 0    | R.VQDSVILASSK.A                                         |
| 1621.8742 | 1620.8670 | 1620.8624 | 2.83   | 96    | - 109 | 0    | R.RPYQVNVLLIGGYDK.K                                     |
| 1681.8746 | 1680.8674 | 1680.8723 | -2.92  | 112   | - 125 | 0    | K.NKPELYQIDYLGTK.V                                      |
| 1726.8333 | 1725.8261 | 1725.8210 | 2.95   | 71    | - 85  | 0    | R.EDYELSPQAVSSFVR.Q                                     |
| 4272.1755 | 4271.1682 | 4271.0310 | 32.1   | 126   | - 162 | 0    | K.VELPYGAHGYSGFYTFSLDHHYRPDMTTEGLDLLK.L                 |
| 4288.1835 | 4287.1762 | 4287.0259 | 35.1   | 126   | - 162 | 0    | K.VELPYGAHGYSGFYTFSLDHHYRPDMTTEGLDLLK.L + Oxidation (M) |

No match to: 972.5487, 988.5405

## Pre2

### Mass-spectrum:

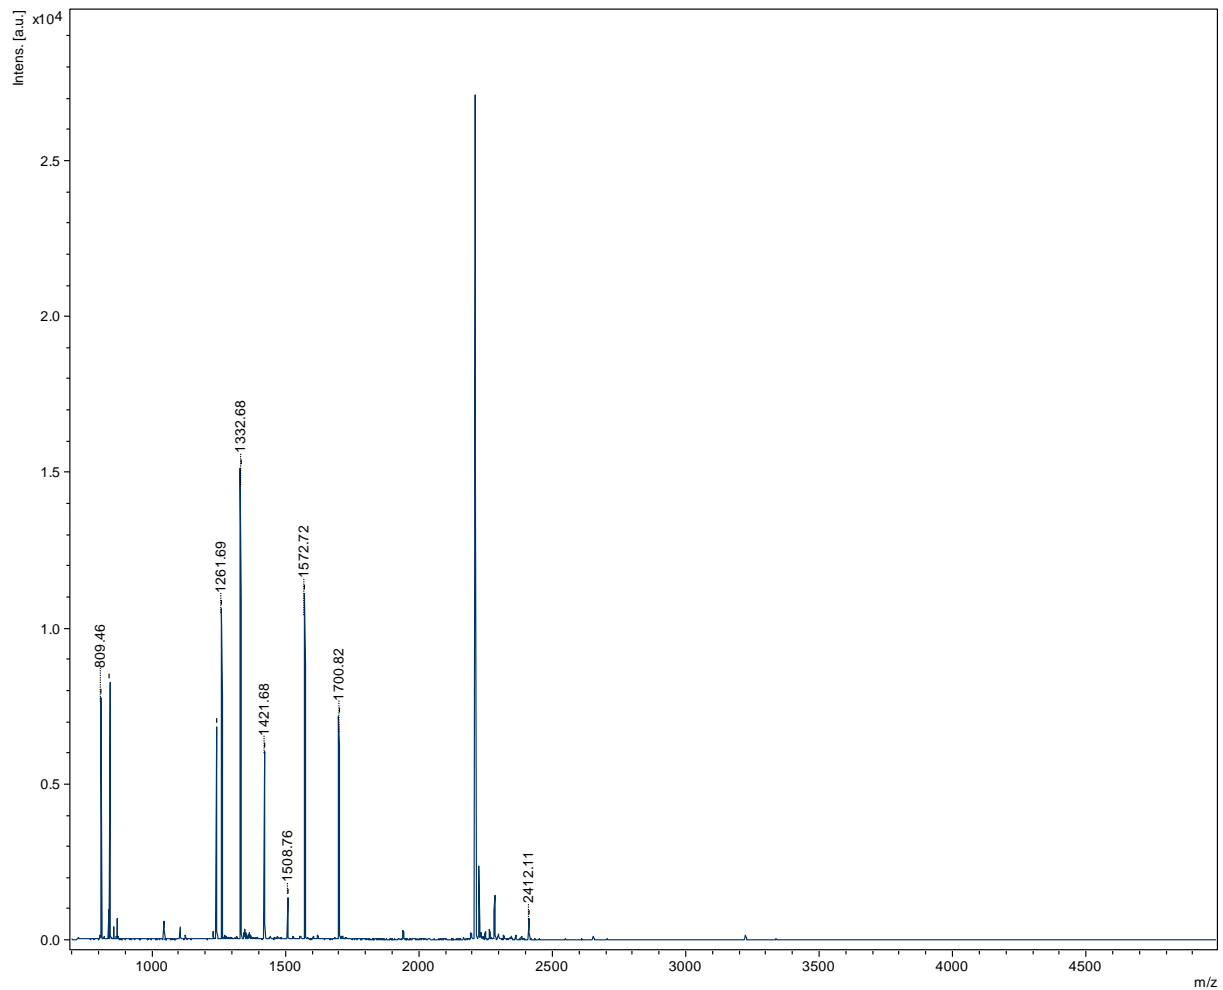

### Identification:

[gi|11514002](#) **Mass:** 23286 **Score:** 194 **Expect:** 7.2e-13 **Matches:** 10

Chain K, A Gated Channel Into The Proteasome Core Particle

| Observed  | Mr (expt) | Mr (calc) | ppm   | Start | End | Miss | Peptide                                    |
|-----------|-----------|-----------|-------|-------|-----|------|--------------------------------------------|
| 809.4560  | 808.4487  | 808.4443  | 5.46  | 1     | 7   | 0    | -.TTTLAFR.F                                |
| 838.4897  | 837.4824  | 837.4821  | 0.40  | 160   | 167 | 0    | R.SILAAHR.D                                |
| 1240.6845 | 1239.6772 | 1239.6863 | -7.34 | 82    | 91  | 0    | K.ILSNLVYQYK.G                             |
| 1261.6886 | 1260.6813 | 1260.6826 | -1.05 | 8     | 19  | 0    | R.FQGGIIVAVDSR.A                           |
| 1332.6844 | 1331.6771 | 1331.6834 | -4.70 | 20    | 32  | 0    | R.ATAGNWWASQTVK.K                          |
| 1421.6790 | 1420.6717 | 1420.6834 | -8.22 | 200   | 212 | 1    | K.VKEEGSFNNVIG.-                           |
| 1508.7573 | 1507.7500 | 1507.7558 | -3.86 | 146   | 158 | 0    | K.WDLSVEDALYLGR.R                          |
| 1572.7225 | 1571.7152 | 1571.7104 | 3.07  | 108   | 121 | 0    | K.EGPTIYYVDSGTR.L                          |
| 1700.8175 | 1699.8102 | 1699.8053 | 2.87  | 107   | 121 | 1    | R.KEGPTIYYVDSGTR.L                         |
| 2412.1086 | 2411.1013 | 2411.1104 | -3.77 | 124   | 145 | 0    | K.GDIFCVGSGQTFAYGVLDSENYK.W + Propionamide |

# Pre3

## Mass-spectrum:

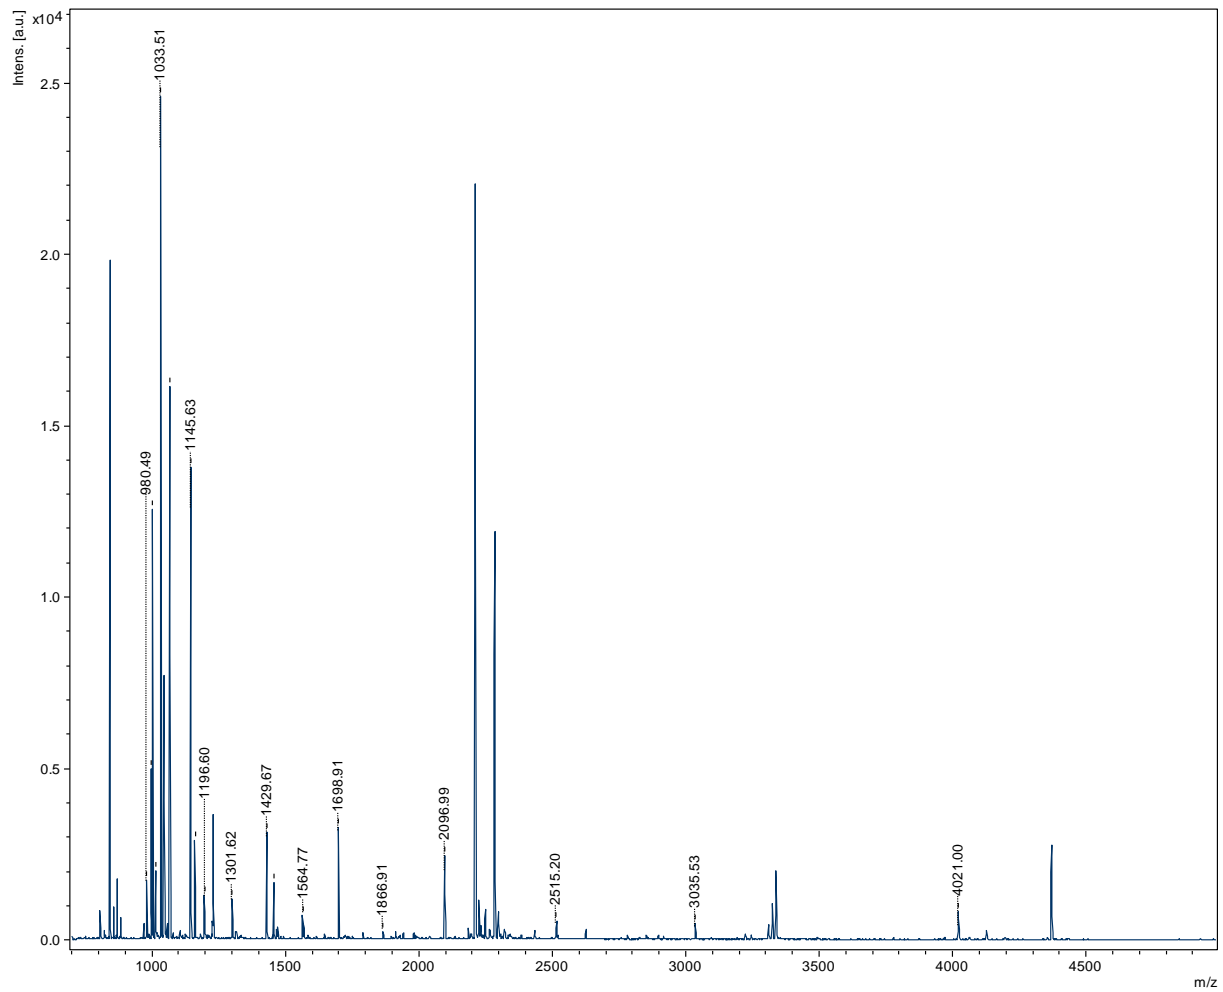

## Identification:

[gi|11513426](https://pubmed.ncbi.nlm.nih.gov/11513426/)

Mass: 21481

Score: 251

Expect: 1.4e-18

Matches: 16

Chain N, Crystal Structure Of Epoxomicin:20s Proteasome Reveals A Molecular Basis For Selectivity Of Alpha,Beta-Epoxyke

| Observed  | Mr (expt) | Mr (calc) | ppm    | Start | End | Miss | Peptide |                                               |
|-----------|-----------|-----------|--------|-------|-----|------|---------|-----------------------------------------------|
| 980.4863  | 979.4790  | 979.4862  | -7.34  | 149   | -   | 156  | 0       | K.EETVDFIK.H                                  |
| 997.5306  | 996.5233  | 996.5314  | -8.14  | 1     | -   | 9    | 0       | -.TSIMAVTFK.D                                 |
| 1002.5243 | 1001.5171 | 1001.5142 | 2.89   | 10    | -   | 19   | 0       | K.DGVILGADSR.T                                |
| 1013.5226 | 1012.5153 | 1012.5263 | -10.86 | 1     | -   | 9    | 0       | -.TSIMAVTFK.D + Oxidation (M)                 |
| 1033.5107 | 1032.5035 | 1032.4989 | 4.44   | 165   | -   | 174  | 0       | K.WDGSSGGVIR.M                                |
| 1067.5549 | 1066.5477 | 1066.5407 | 6.52   | 20    | -   | 29   | 0       | R.TTTGAYIANR.V                                |
| 1145.6336 | 1144.6263 | 1144.6274 | -0.97  | 175   | -   | 185  | 0       | R.MVVLTAAGVER.L                               |
| 1161.6216 | 1160.6143 | 1160.6223 | -6.93  | 175   | -   | 185  | 0       | R.MVVLTRAGVER.L + Oxidation (M)               |
| 1301.6247 | 1300.6174 | 1300.6169 | 0.39   | 37    | -   | 45   | 1       | R.VHDKIWCCR.S + 2 Propionamide (C)            |
| 1429.6718 | 1428.6645 | 1428.6813 | -11.75 | 186   | -   | 196  | 0       | R.LIFYPDEYQL.-                                |
| 1456.7750 | 1455.7677 | 1455.7722 | -3.09  | 108   | -   | 121  | 0       | K.GEVYTIPLGGSVHK.L                            |
| 1564.7690 | 1563.7617 | 1563.7780 | -10.45 | 91    | -   | 105  | 0       | K.DNLTAGIIVAGYDDK.N                           |
| 1698.9108 | 1697.9035 | 1697.9101 | -3.86  | 106   | -   | 121  | 1       | K.NKGEVYTIPLGGSVHK.L                          |
| 2096.9863 | 2095.9790 | 2095.9925 | -6.42  | 122   | -   | 140  | 0       | K.LPYAIAAGSGSTFIYGYCDK.N + Propionamide (C)   |
| 2515.1950 | 2514.1878 | 2514.1948 | -2.79  | 84    | -   | 105  | 1       | K.ELCYENKDNLTAGIIVAGYDDK.N + Propionamide (C) |
| 4020.9992 | 4019.9919 | 4019.9276 | 16.0   | 46    | -   | 83   | 0       | R.SGSAADTQAIADIVQYHLELYTSQYGTPTETAASVFK.E     |

No match to: 1196.5962, 1866.9107, 3035.5264

# Pre4

## Mass-spectrum:

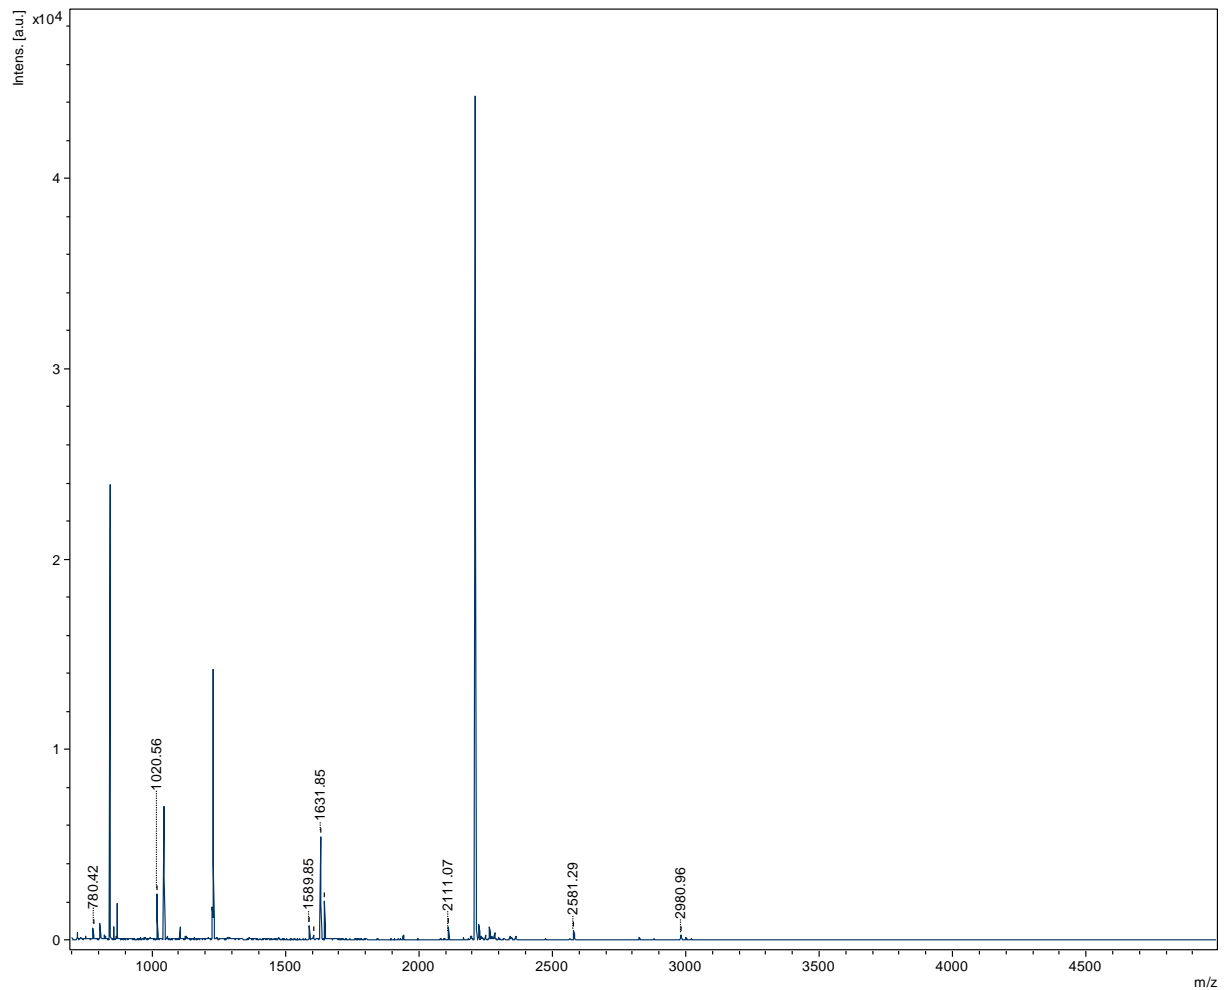

## Identification:

[gi|3114282](#) **Mass:** 25903 **Score:** 109 **Expect:** 0.00023 **Matches:** 8

Chain N, Crystal Structure Of The 20s Proteasome From Yeast At 2.4 Angstroms Resolution

| Observed  | Mr(expt)  | Mr(calc)  | ppm    | Start | End | Miss | Peptide |                                              |
|-----------|-----------|-----------|--------|-------|-----|------|---------|----------------------------------------------|
| 780.4249  | 779.4177  | 779.4178  | -0.13  | 203   | -   | 209  | 0       | K.NTGLTFK.K                                  |
| 1020.5641 | 1019.5568 | 1019.5651 | -8.16  | 194   | -   | 202  | 0       | R.NFSLAIDK.N                                 |
| 1589.8452 | 1588.8379 | 1588.8495 | -7.29  | 1     | -   | 15   | 0       | -.TQQPIVIGTSVISMK.Y                          |
| 1605.8338 | 1604.8265 | 1604.8444 | -11.13 | 1     | -   | 15   | 0       | -.TQQPIVIGTSVISMK.Y + Oxidation (M)          |
| 1631.8465 | 1630.8393 | 1630.8348 | 2.71   | 168   | -   | 182  | 0       | K.TTVQVAEEAIVNAMR.V                          |
| 1647.8321 | 1646.8249 | 1646.8298 | -2.97  | 168   | -   | 182  | 0       | K.TTVQVAEEAIVNAMR.V + Oxidation (M)          |
| 2111.0715 | 2110.0642 | 2110.0695 | -2.47  | 16    | -   | 35   | 0       | K.YDNGVIIAADNLGSYGSLLR.F                     |
| 2581.2919 | 2580.2847 | 2580.2854 | -0.28  | 42    | -   | 65   | 0       | R.LIPVGDNTVVGISGDISDMQHIER.L + Oxidation (M) |

No match to: 2980.9648

# Pre6

## Mass-spectrum:

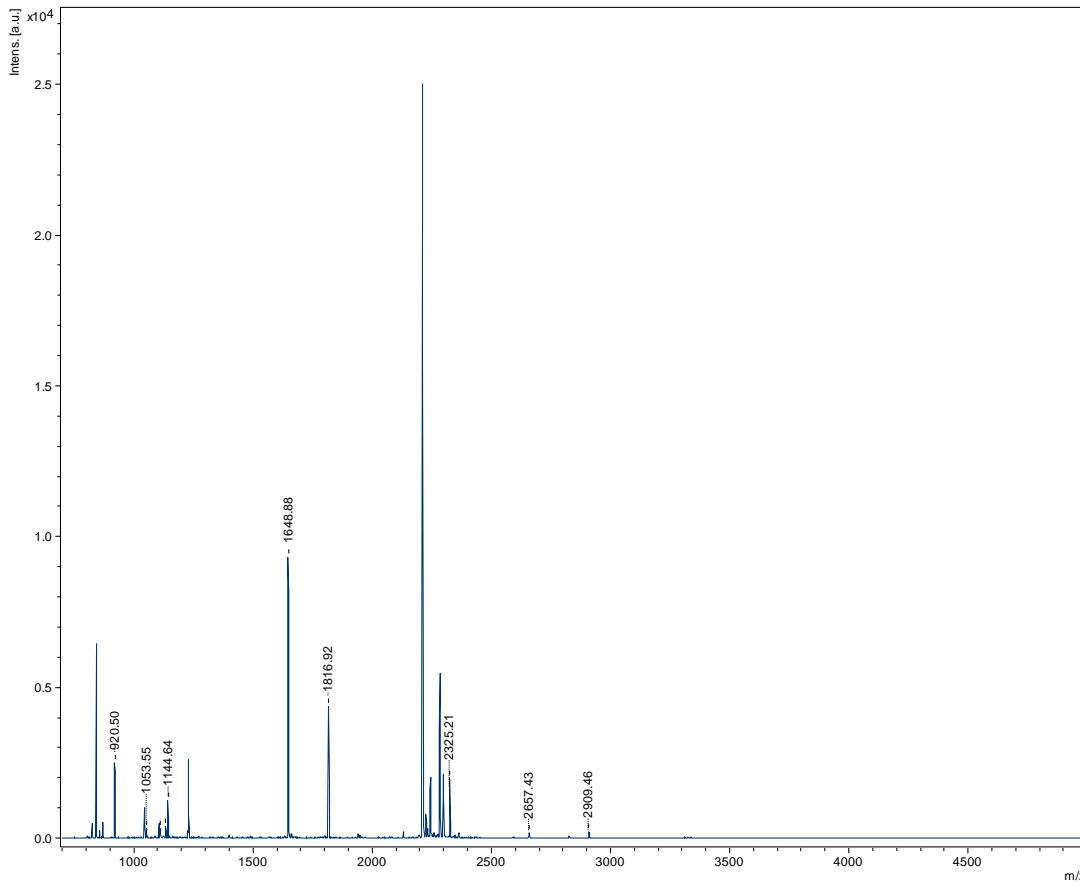

## Identification:

[gi|298508225](#)

Mass: 25337

Score: **151**

Expect: 1.4e-08

Matches: 9

Chain D, Proteasome Activator Complex

| Observed  | Mr(expt)  | Mr(calc)  | ppm    | Start | End | Miss | Peptide                            |
|-----------|-----------|-----------|--------|-------|-----|------|------------------------------------|
| 920.4969  | 919.4897  | 919.4876  | 2.27   | 96    | 103 | 0    | R.YVAGVQQR.Y                       |
| 1053.5469 | 1052.5396 | 1052.5475 | -7.49  | 73    | 81  | 1    | K.ARVEAQSHR.L                      |
| 1134.5359 | 1133.5286 | 1133.5321 | -3.12  | 24    | 32  | 0    | K.NCVVLGCER.R + 2 Propionamide (C) |
| 1144.6443 | 1143.6370 | 1143.6499 | -11.29 | 182   | 192 | 0    | R.SLLEVVTGAK.N                     |
| 1648.8790 | 1647.8717 | 1647.8719 | -0.14  | 82    | 95  | 0    | R.LTLEDPVIVEYLIR.Y                 |
| 1816.9241 | 1815.9168 | 1815.9115 | 2.91   | 51    | 67  | 0    | K.IDSHVVLSFSGLNADSR.I              |
| 2325.2071 | 2324.1998 | 2324.1914 | 3.63   | 104   | 125 | 0    | R.YTQSGGVRPFGVSTLIAGFDPR.D         |
| 2657.4348 | 2656.4276 | 2656.4184 | 3.44   | 43    | 67  | 2    | R.ITPSKVS KIDSHVVLSFSGLNADSR.I     |
| 2909.4633 | 2908.4560 | 2908.4356 | 7.04   | 104   | 130 | 1    | R.YTQSGGVRPFGVSTLIAGFDPRDEPK.L     |

No match to: 1111.5450



# Pre7

## Mass-spectrum:

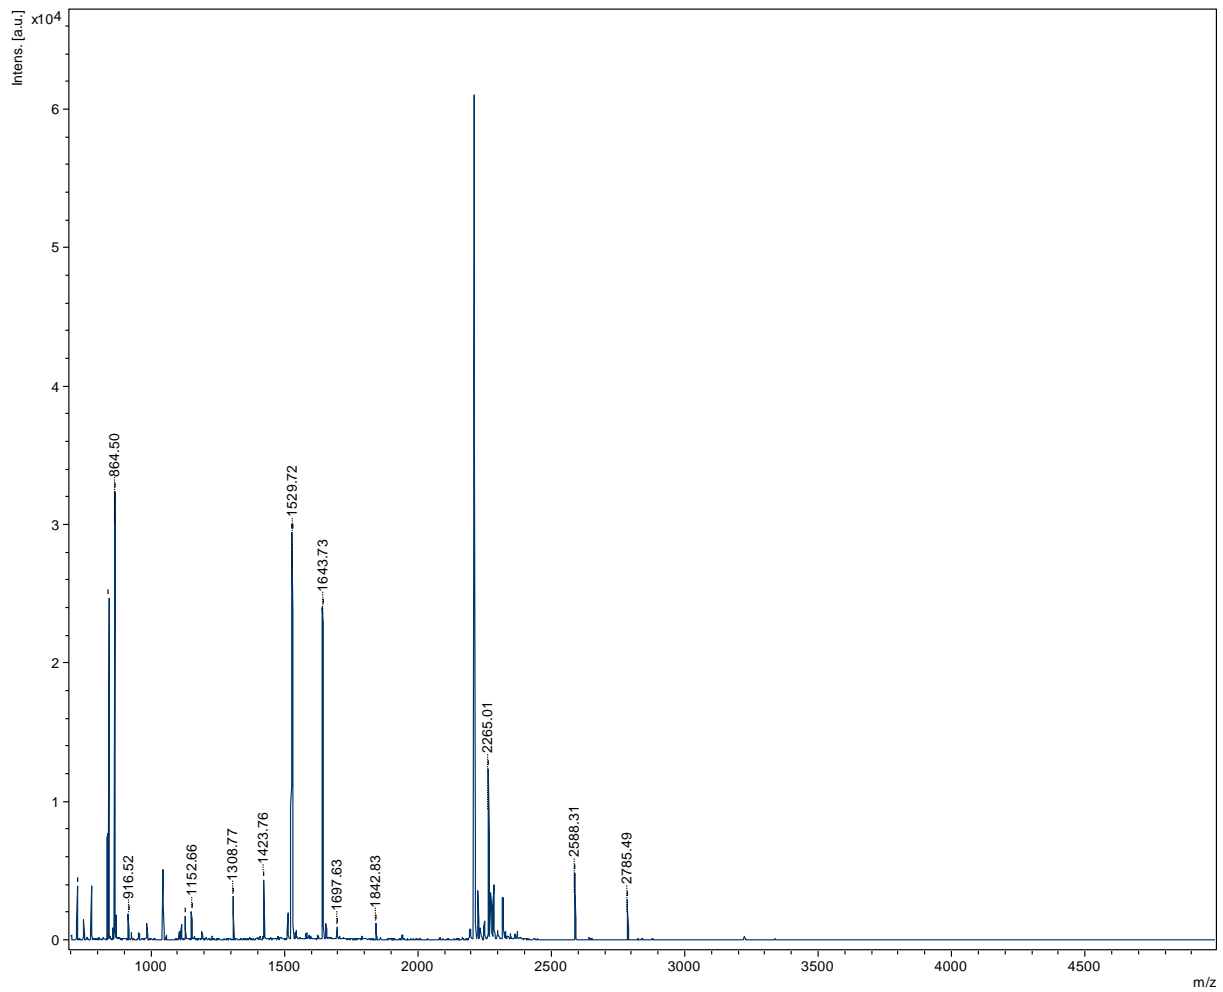

## Identification:

[gi|3114281](https://pubchem.ncbi.nlm.nih.gov/compound/3114281)

Mass: 24836

Score: 120

Expect: 1.8e-05

Matches: 7

Chain M, Crystal Structure Of The 20s Proteasome From Yeast At 2.4 Angstroms Resolution

| Observed  | Mr (expt) | Mr (calc) | ppm   | Start | End | Miss | Peptide                                                        |
|-----------|-----------|-----------|-------|-------|-----|------|----------------------------------------------------------------|
| 831.4664  | 830.4591  | 830.4610  | -2.21 | 84    | 91  | 0    | K.LSINSAAR.N                                                   |
| 1013.4514 | 1012.4442 | 1012.4462 | -1.96 | 186   | 194 | 0    | R.DSFTSATER.H                                                  |
| 1079.5887 | 1078.5814 | 1078.5910 | -8.86 | 174   | 182 | 0    | K.YLSVEEVIK.L                                                  |
| 1182.5769 | 1181.5696 | 1181.5676 | 1.65  | 29    | 38  | 0    | R.NITDYSINSR.Y                                                 |
| 1546.7313 | 1545.7240 | 1545.7100 | 9.09  | 120   | 133 | 0    | K.GAVYSFDPVGSYER.E                                             |
| 2080.0432 | 2079.0359 | 2079.0459 | -4.80 | 138   | 157 | 0    | R.AGGAAASLIMPFLDNQVNFK.N + Oxidation (M)                       |
| 2516.1182 | 2515.1109 | 2515.1359 | -9.94 | 43    | 66  | 0    | K.VFDCGDNIVMSANGFAADGDALVK.R + Oxidation (M); Propionamide (C) |

No match to: 2265.0097, 2851.3574

# Pre8

## Mass-spectrum:

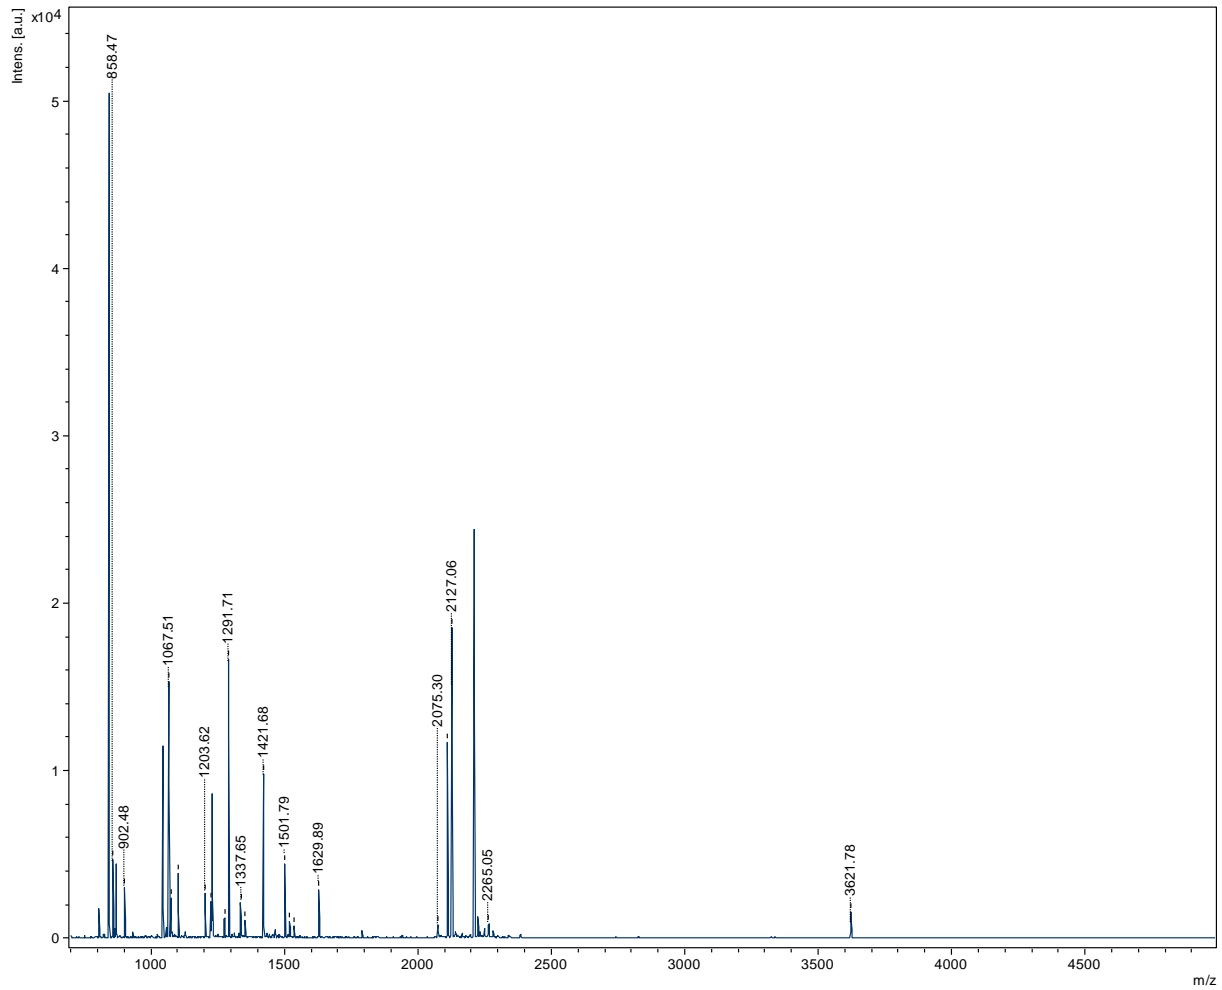

## Identification:

[gi|6323547](https://www.ncbi.nlm.nih.gov/nuccore/gi|6323547)

Mass: 27145

Score: 550

Expect: 1.8e-48

Matches: 15

Pre8p [Saccharomyces cerevisiae S288c]

| Observed  | Mr (expt) | Mr (calc) | ppm    | Start | End | Miss | Ions | Peptide                                  |
|-----------|-----------|-----------|--------|-------|-----|------|------|------------------------------------------|
| 858.4728  | 857.4656  | 857.5222  | -66.04 | 109   | 116 | 0    | ---  | K.LLVSEVAK.I                             |
| 902.4785  | 901.4712  | 901.5233  | -57.73 | 30    | 38  | 0    | ---  | K.QGVISLGIK.A                            |
| 1067.5088 | 1066.5015 | 1066.5335 | -29.97 | 100   | 108 | 0    | 54   | R.IYGEYPTK.L                             |
| 1075.5131 | 1074.5058 | 1074.5305 | -23.02 | 238   | 246 | 0    | ---  | K.LTSQEINDR.L                            |
| 1102.5759 | 1101.5686 | 1101.6030 | -31.18 | 39    | 49  | 0    | ---  | K.AINGVVIATEK.K                          |
| 1203.6157 | 1202.6084 | 1202.6255 | -14.20 | 237   | 246 | 1    | ---  | R.KLTSQEINDR.L                           |
| 1223.6262 | 1222.6189 | 1222.6346 | -12.82 | 99    | 108 | 1    | ---  | K.RIYGEYPTK.L                            |
| 1291.7081 | 1290.7008 | 1290.7183 | -13.60 | 18    | 29  | 0    | 78   | K.LGQIDYALTAVK.Q                         |
| 1337.6480 | 1336.6407 | 1336.6544 | -10.25 | 51    | 63  | 0    | ---  | K.SSSPLAMSETLSK.V                        |
| 1353.6402 | 1352.6330 | 1352.6493 | -12.09 | 51    | 63  | 0    | ---  | K.SSSPLAMSETLSK.V + Oxidation (M)        |
| 1421.6838 | 1420.6766 | 1420.6875 | -7.67  | 5     | 17  | 0    | 79   | R.YSFSLTIFSPSGK.L                        |
| 1501.7880 | 1500.7808 | 1500.7784 | 1.60   | 238   | 250 | 1    | ---  | K.LTSQEINDRLEAL.-                        |
| 2111.0600 | 2110.0527 | 2110.0405 | 5.78   | 64    | 83  | 0    | 139  | K.VSLLTPDIGAVYSGMGPDYR.V                 |
| 2127.0580 | 2126.0507 | 2126.0354 | 7.19   | 64    | 83  | 0    | ---  | K.VSLLTPDIGAVYSGMGPDYR.V + Oxidation (M) |
| 3621.7793 | 3620.7720 | 3620.7257 | 12.8   | 198   | 231 | 0    | ---  | K.ESVEGEFNGDTIELAIIGDENPDLLGYTGIPDK.G    |

No match to: 1276.6245, 1520.7460, 1536.7419, 1629.8904, 2075.2977, 2265.0508

# Pre9

## Mass-spectrum:

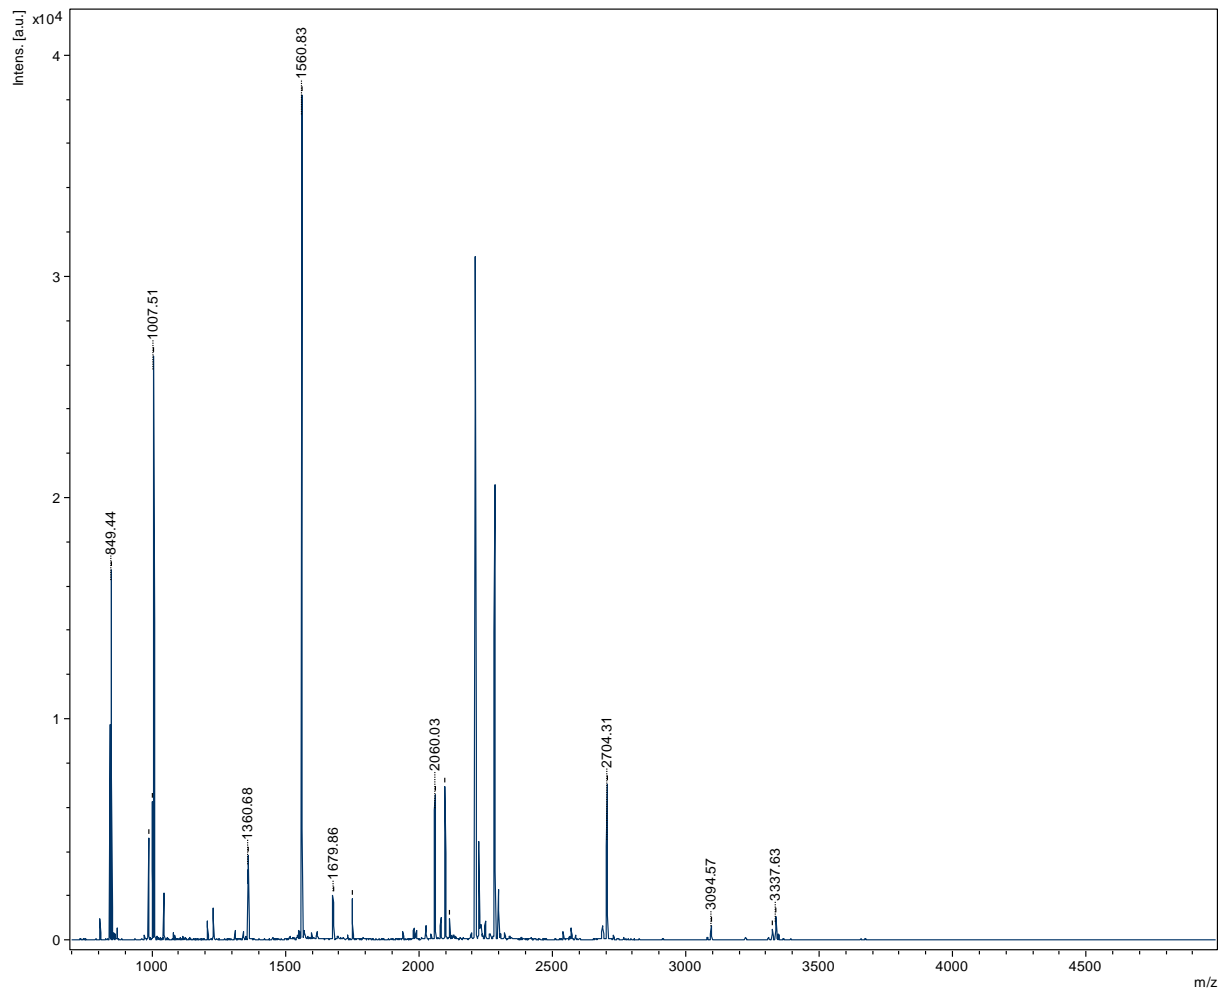

## Identification:

[gi|3114271](#) Mass: 27003 Score: 467 Expect: 3.6e-

40 Matches: 9

Chain C, Crystal Structure Of The 20s Proteasome From Yeast At 2.4 Angstroms Resolution

| Observed  | Mr(expt)  | Mr(calc)  | ppm    | Start | End | Miss | Ions | Peptide                      |
|-----------|-----------|-----------|--------|-------|-----|------|------|------------------------------|
| 849.4430  | 848.4357  | 848.4756  | -46.95 | 210   | 216 | 0    | ---  | R.LEFATIR.K                  |
| 986.5208  | 985.5135  | 985.5345  | -21.30 | 92    | 99  | 0    | ---  | R.IHAQNYLK.T                 |
| 1002.5741 | 1001.5668 | 1001.5909 | -24.09 | 228   | 235 | 0    | ---  | K.IFKPQEIK.D                 |
| 1007.5056 | 1006.4983 | 1006.5084 | -9.98  | 9     | 17  | 0    | 46   | R.TTIFSPTEGR.L               |
| 1560.8267 | 1559.8195 | 1559.8195 | -0.03  | 100   | 112 | 0    | 99   | K.TYNEDIPVEILVR.R            |
| 1679.8610 | 1678.8537 | 1678.8625 | -5.25  | 50    | 64  | 1    | ---  | R.KVTSTILLEQDTSTEK.L         |
| 2060.0345 | 2059.0273 | 2059.0222 | 2.47   | 199   | 216 | 1    | 60   | K.TDSSALTYDRLEFATIR.K        |
| 2098.9581 | 2097.9508 | 2097.9432 | 3.62   | 143   | 160 | 0    | 132  | R.YGYQLYTSNPSGNYTGWK.A       |
| 2704.3071 | 2703.2998 | 2703.2830 | 6.20   | 119   | 142 | 0    | ---  | K.QGYTQHGGLRPFVGSFIYAGYDDR.Y |

No match to: 1360.6763, 1362.5970, 1750.8711, 2114.9560, 3094.5718, 3323.6187, 3337.6344

# Pup2

## Mass-spectrum:

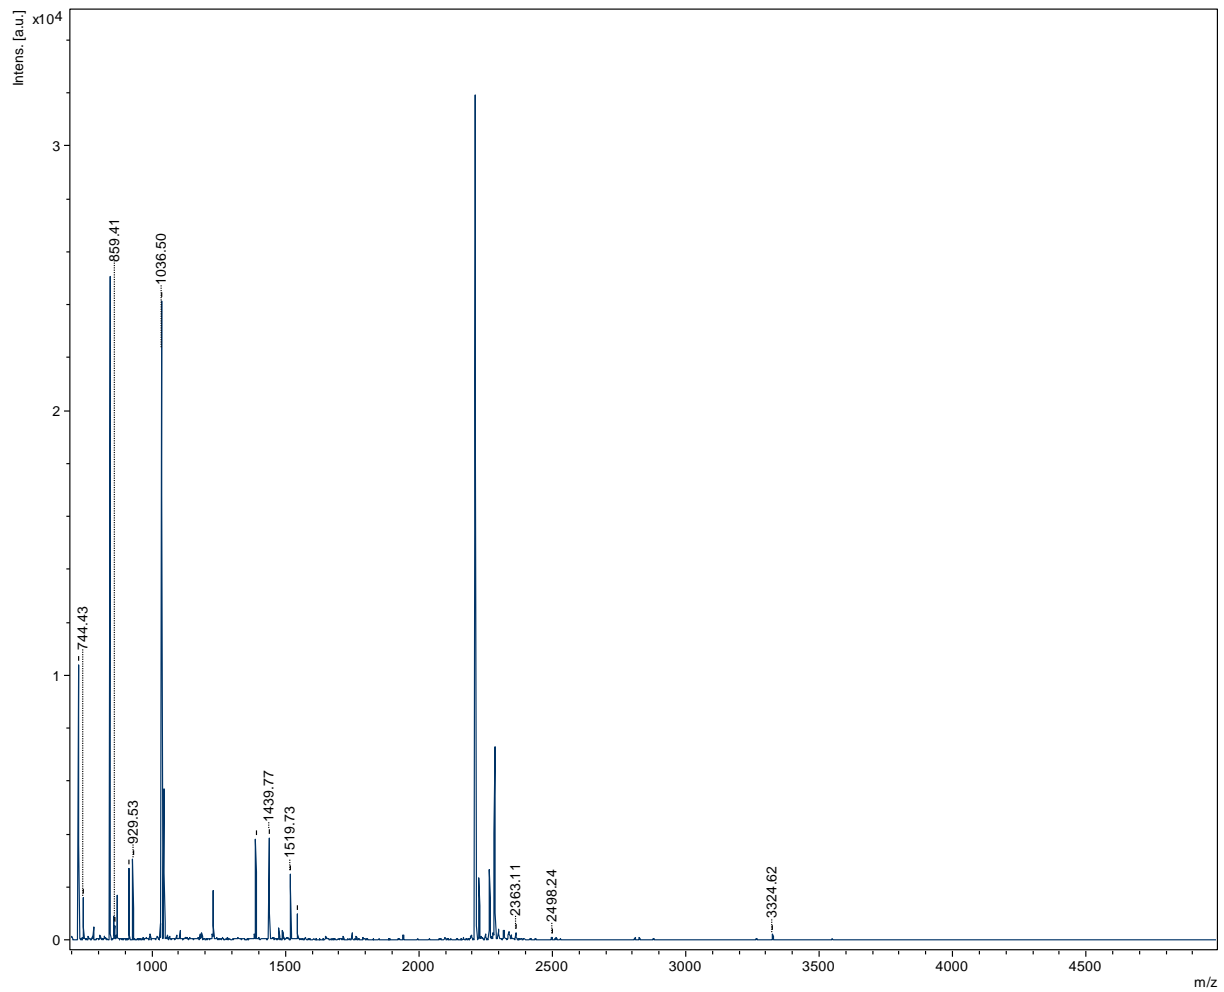

## Identification:

[gi|298508226](https://www.ncbi.nlm.nih.gov/nuccore/gi|298508226)

**Mass:** 27525

**Score:** 217

**Expect:** 3.6e-15

**Matches:** 13

Chain E, Proteasome Activator Complex

| Observed  | Mr (expt) | Mr (calc) | ppm   | Start | End | Miss | Peptide                                                         |
|-----------|-----------|-----------|-------|-------|-----|------|-----------------------------------------------------------------|
| 725.3733  | 724.3660  | 724.3578  | 11.4  | 1     | 5   | 0    | - <sub>1</sub> MFLTR.S + Acetyl (Protein N-term); Oxidation (M) |
| 744.4316  | 743.4243  | 743.4177  | 8.88  | 67    | 72  | 0    | K.IVEIDR.H                                                      |
| 859.4103  | 858.4030  | 858.4018  | 1.45  | 87    | 93  | 0    | R.SMIEHAR.T + Oxidation (M)                                     |
| 914.5503  | 913.5430  | 913.5484  | -5.91 | 195   | 202 | 0    | K.EAELLVLK.I                                                    |
| 929.5254  | 928.5181  | 928.5229  | -5.23 | 44    | 52  | 0    | K.EGVVLGVEK.R                                                   |
| 1036.4968 | 1035.4895 | 1035.4985 | -8.71 | 11    | 20  | 0    | R.GVSTFSPEGR.L                                                  |
| 1038.4456 | 1037.4383 | 1037.4414 | -3.00 | 123   | 132 | 0    | R.FGEGASGEER.L                                                  |
| 1389.7084 | 1388.7012 | 1388.7035 | -1.66 | 54    | 66  | 0    | R.ATSPLESDSIEK.I                                                |
| 1439.7723 | 1438.7651 | 1438.7708 | -3.95 | 21    | 32  | 0    | R.LFQVEYSLEAIK.L                                                |
| 1519.7349 | 1518.7276 | 1518.7348 | -4.73 | 212   | 224 | 0    | K.LDENNAQLSCITK.Q + Propionamide (C)                            |
| 1545.8164 | 1544.8092 | 1544.8046 | 2.98  | 53    | 66  | 1    | K.RATSPLESDSIEK.I                                               |
| 2498.2448 | 2497.2375 | 2497.2448 | -2.93 | 171   | 194 | 0    | K.AIGSGSEGAQELLNEWHSSLTLK.E                                     |
| 3324.6246 | 3323.6173 | 3323.5980 | 5.81  | 94    | 122 | 0    | R.TAAVTHNLYYDEDINVESLTQSVCDLALR.F + Propionamide (C)            |

No match to: 2363.1102

# Pup3

## Mass-spectrum:

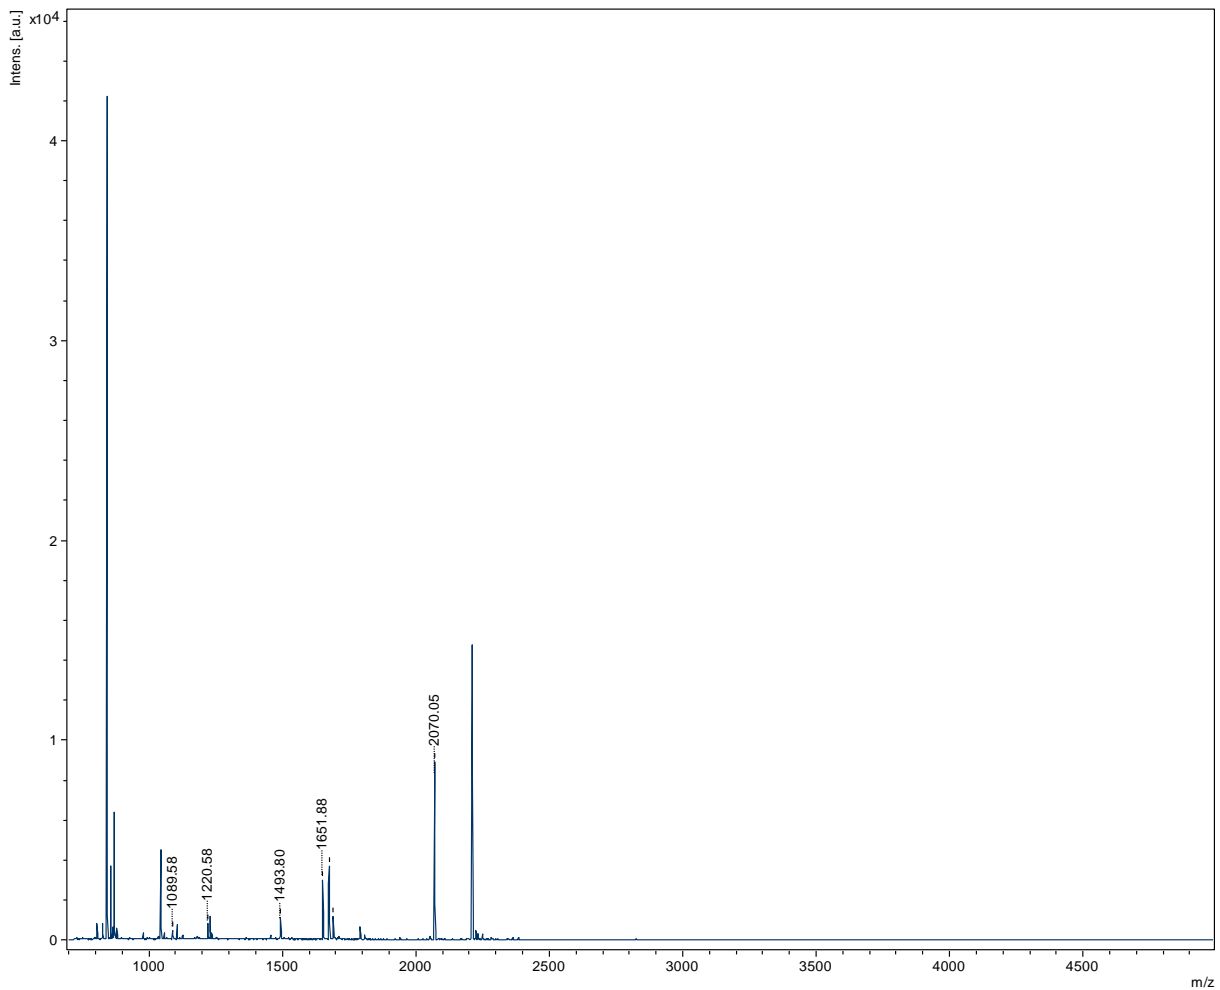

## Identification:

[gi|323309416](https://www.ncbi.nlm.nih.gov/nuccore/gi|323309416)

Mass: 21263

Score: 87

Expect: 0.039

Matches: 5

Pup3p [Saccharomyces cerevisiae Fosters0]

| Observed  | Mr(expt)  | Mr(calc)  | ppm   | Start | End | Miss | Peptide                             |
|-----------|-----------|-----------|-------|-------|-----|------|-------------------------------------|
| 1089.5814 | 1088.5742 | 1088.5826 | -7.73 | 15    | 25  | 0    | R.LGSQSLGVSNK.F                     |
| 1220.5782 | 1219.5709 | 1219.5689 | 1.64  | 5     | 14  | 0    | K.DCVAIACDLR.L + 2 Propionamide (C) |
| 1493.7990 | 1492.7918 | 1492.7885 | 2.16  | 15    | 28  | 1    | R.LGSQSLGVSNKFEK.I                  |
| 1651.8803 | 1650.8730 | 1650.8770 | -2.42 | 86    | 101 | 0    | R.FGPYFVGPVVAGINSK.S                |
| 2070.0509 | 2069.0436 | 2069.0317 | 5.78  | 67    | 84  | 0    | R.AIEPETFTQLVSSSLYER.R              |

No match to: 1674.8348, 1690.8224

## Put2

### Mass-spectrum:

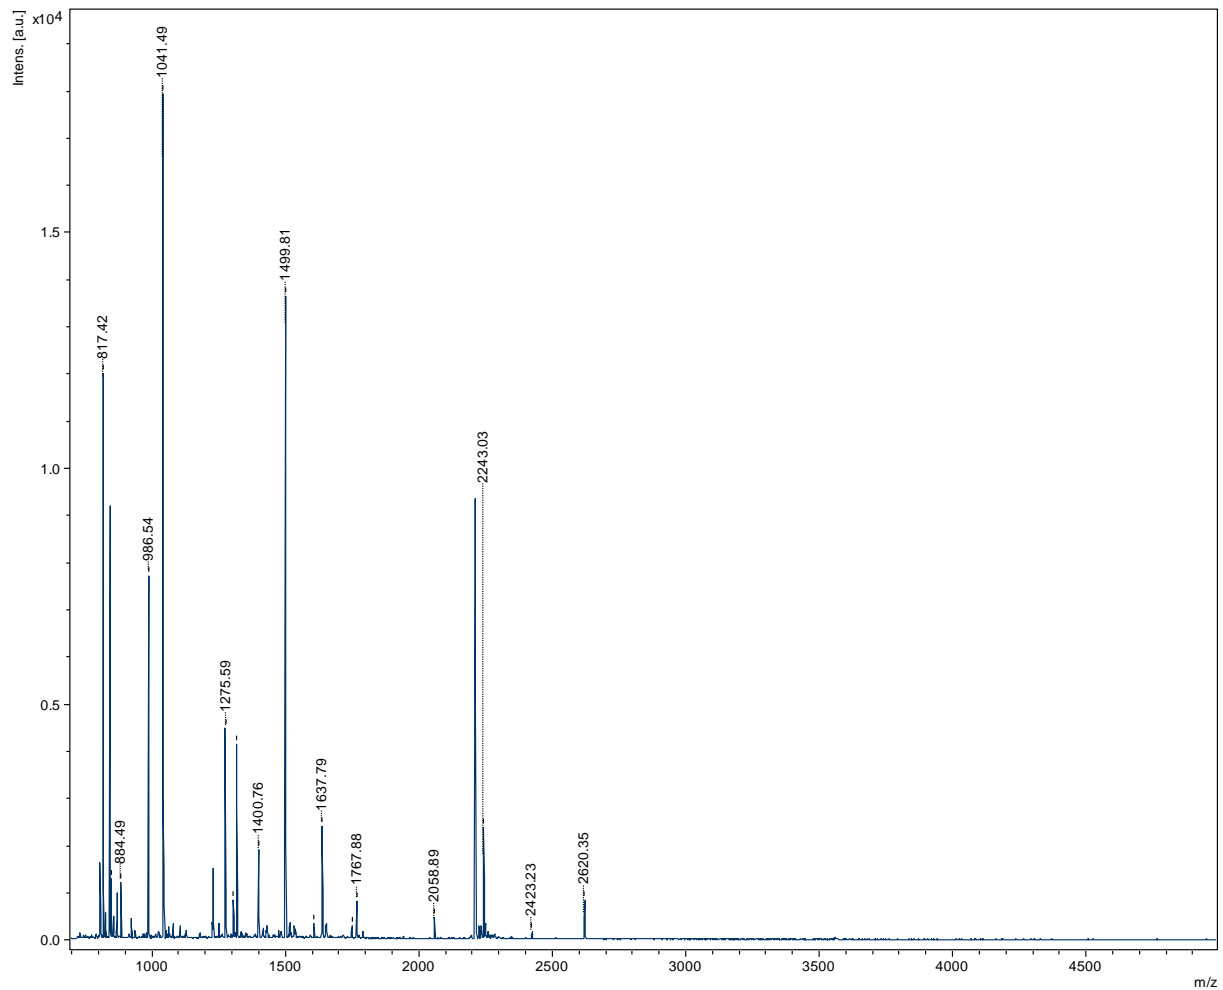

### Identification:

[gi|6321826](#) Mass: 64394 Score: 247 Expect: 3.6e-18 Matches: 17

Put2p [Saccharomyces cerevisiae S288c]

| Observed  | Mr (expt) | Mr (calc) | ppm    | Start | End   | Miss | Peptide                                |
|-----------|-----------|-----------|--------|-------|-------|------|----------------------------------------|
| 817.4177  | 816.4104  | 816.4130  | -3.20  | 43    | - 48  | 0    | K.DWDLR.A                              |
| 849.4580  | 848.4508  | 848.4643  | -16.00 | 357   | - 363 | 0    | R.LYLPESK.S                            |
| 884.4942  | 883.4869  | 883.4875  | -0.71  | 543   | - 551 | 0    | K.AGGPNILSR.F                          |
| 986.5383  | 985.5311  | 985.5345  | -3.50  | 30    | - 37  | 0    | R.NEPVKPFR.N                           |
| 1041.4886 | 1040.4813 | 1040.4927 | -10.97 | 342   | - 350 | 0    | R.GTFEFQGQK.C                          |
| 1275.5941 | 1274.5869 | 1274.5931 | -4.93  | 510   | - 520 | 0    | K.FSAGNFYINDK.C                        |
| 1305.5934 | 1304.5862 | 1304.5925 | -4.83  | 560   | - 569 | 0    | K.ENFYELIDFK.Y                         |
| 1318.7103 | 1317.7030 | 1317.7081 | -3.89  | 435   | - 446 | 0    | K.SQWFVGPVIR.A                         |
| 1400.7576 | 1399.7504 | 1399.7459 | 3.16   | 38    | - 48  | 1    | R.NIDLKDWDLR.A                         |
| 1499.8105 | 1498.8032 | 1498.7991 | 2.76   | 56    | - 69  | 0    | K.SSSLEVPLVINGER.I                     |
| 1607.7435 | 1606.7363 | 1606.7450 | -5.44  | 397   | - 410 | 0    | R.GFMGPFVIHEQSFDK.L + Oxidation (M)    |
| 1637.7946 | 1636.7873 | 1636.7780 | 5.65   | 521   | - 535 | 0    | K.CTGAVVSQQWFGGAR.M + Propionamide (C) |
| 1749.8315 | 1748.8242 | 1748.8226 | 0.94   | 139   | - 153 | 1    | K.YRYDMLAATMLGQK.N + 2 Oxidation (M)   |
| 1767.8823 | 1766.8750 | 1766.8727 | 1.32   | 420   | - 434 | 1    | K.KDPELEILYGGQYDK.S                    |
| 2058.8901 | 2057.8828 | 2057.8894 | -3.22  | 560   | - 575 | 1    | K.ENFYELIDFKYPSNYE.-                   |
| 2243.0261 | 2242.0189 | 2242.0178 | 0.46   | 176   | - 195 | 0    | K.YADLYAQQPVESADGTWVK.A                |
| 2620.3509 | 2619.3436 | 2619.3405 | 1.19   | 77    | - 100 | 0    | R.ALFPQTNPANHQVLANVTQATEK.D            |

No match to: 2423.2348

# Sc11

## Mass-spectrum:

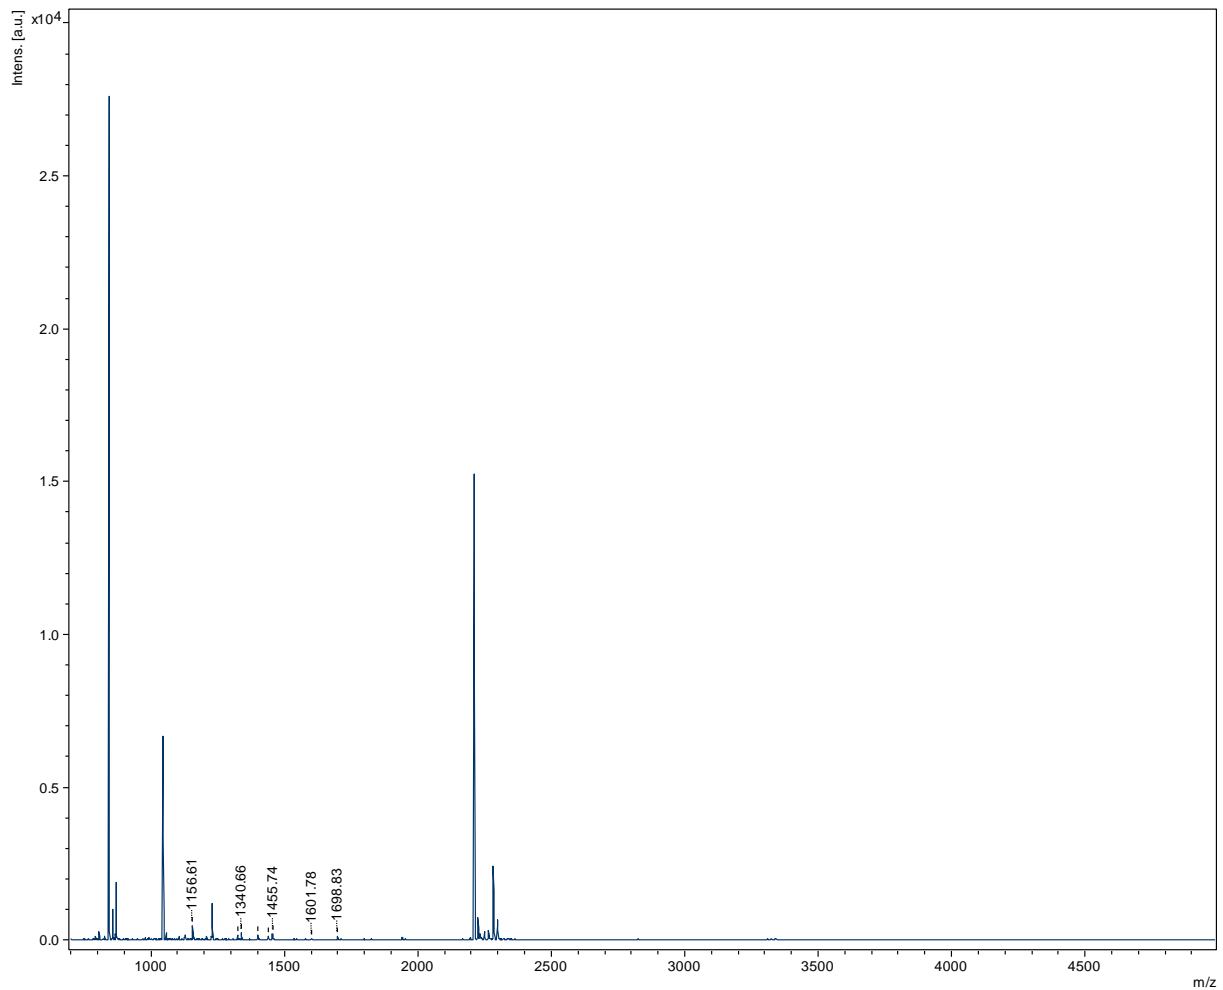

## Identification:

[gi|6321427](#) 27983110 **Score: 110** **Expect: 0.00018** **Matches: 8**

Sc11p [Saccharomyces cerevisiae S288c]

| Observed  | Mr(expt)  | Mr(calc)  | ppm    | Start | End | Miss | Peptide                            |
|-----------|-----------|-----------|--------|-------|-----|------|------------------------------------|
| 1156.6060 | 1155.5987 | 1155.6037 | -4.30  | 15    | 24  | 0    | R.HITIFSPEGR.L                     |
| 1324.6688 | 1323.6616 | 1323.6605 | 0.81   | 121   | 131 | 0    | R.MANLSQIYTQR.A                    |
| 1340.6577 | 1339.6505 | 1339.6554 | -3.69  | 121   | 131 | 0    | R.MANLSQIYTQR.A + Oxidation (M)    |
| 1401.7342 | 1400.7269 | 1400.7372 | -7.34  | 34    | 46  | 0    | K.ATNQTNINSLAVR.G                  |
| 1439.7653 | 1438.7581 | 1438.7602 | -1.52  | 78    | 91  | 0    | R.TIGMVVNGPIPDAR.N                 |
| 1455.7399 | 1454.7326 | 1454.7552 | -15.50 | 78    | 91  | 0    | R.TIGMVVNGPIPDAR.N + Oxidation (M) |
| 1601.7799 | 1600.7726 | 1600.7845 | -7.45  | 175   | 187 | 0    | K.QQEITTNLENHFK.K                  |
| 1698.8347 | 1697.8274 | 1697.8260 | 0.83   | 231   | 244 | 1    | K.DKFFTLAENIEER.L                  |
