# Supplementary material for: Proteomic Screening for Amyloid Proteins
Source: PubMed Central journal article supplement (PMC4280166; doi:10.1371/journal.pone.0116003), 2014-12-30
Supplement: pone.0116003.s004.pdf [file pone.0116003.s004.pdf]

**Table S4.** Identification data of the proteins listed in Table 4.

## Nop1

Mass-spectrum:

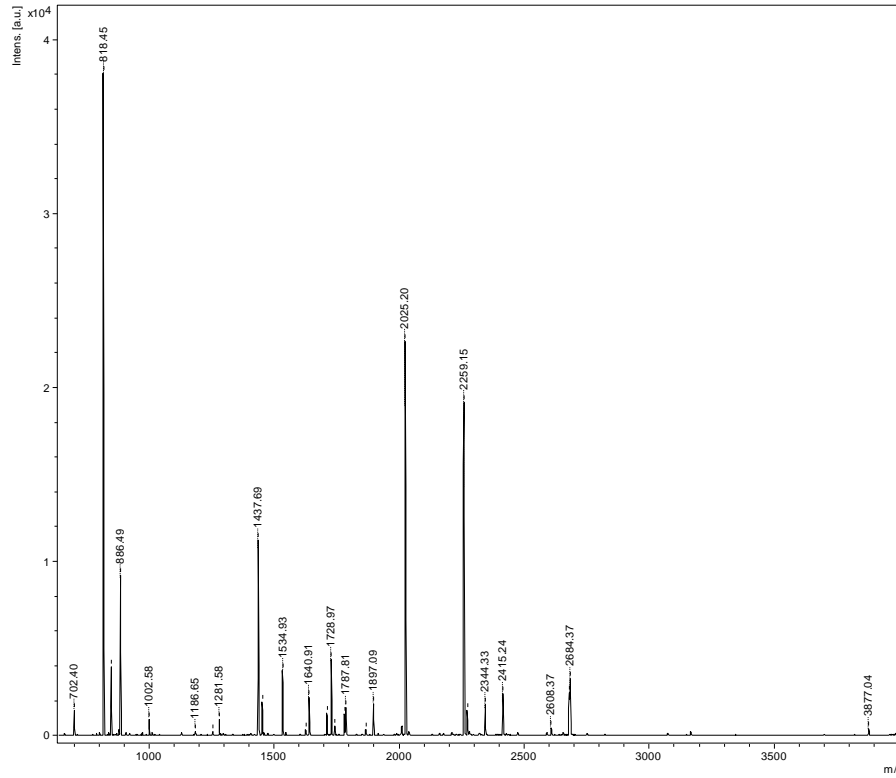

Identification:

[gi|6320190](#) Mass: 34444 Score: **160** Expect: 4.5e-12 Matches: 15

Nop1p [Saccharomyces cerevisiae S288c]

| Observed                                                                                                                                                                     | Mr (expt) | Mr (calc) | ppm   | Start | End | Miss | Peptide                                         |
|------------------------------------------------------------------------------------------------------------------------------------------------------------------------------|-----------|-----------|-------|-------|-----|------|-------------------------------------------------|
| 702.4019                                                                                                                                                                     | 701.3946  | 701.3820  | 18.0  | 293   | -   | 297  | 1 K.LREER.I                                     |
| 818.4471                                                                                                                                                                     | 817.4398  | 817.4235  | 19.9  | 143   | -   | 148  | 0 R.VWNPFR.S                                    |
| 849.4919                                                                                                                                                                     | 848.4846  | 848.4868  | -2.58 | 86    | -   | 92   | 0 K.VVIEPHR.H                                   |
| 886.4877                                                                                                                                                                     | 885.4804  | 885.4821  | -1.87 | 93    | -   | 100  | 0 R.HAGVYIAR.G                                  |
| 1002.5778                                                                                                                                                                    | 1001.5705 | 1001.5757 | -5.21 | 101   | -   | 109  | 1 R.GKEDLLVTK.N                                 |
| 1281.5754                                                                                                                                                                    | 1280.5682 | 1280.5707 | -1.97 | 110   | -   | 121  | 0 K.NMAPGESVYGEK.R                              |
| 1437.6856                                                                                                                                                                    | 1436.6783 | 1436.6718 | 4.57  | 110   | -   | 122  | 1 K.NMAPGESVYGEKR.I                             |
| 1453.6835                                                                                                                                                                    | 1452.6763 | 1452.6667 | 6.58  | 110   | -   | 122  | 1 K.NMAPGESVYGEKR.I + Oxidation (M)             |
| 1534.9254                                                                                                                                                                    | 1533.9181 | 1533.8991 | 12.4  | 213   | -   | 225  | 1 K.KRPNIIPIEDAR.H                              |
| 1711.8647                                                                                                                                                                    | 1710.8574 | 1710.8676 | -5.93 | 123   | -   | 138  | 1 R.ISVEEPSKEDGVPPTK.V                          |
| 1728.9735                                                                                                                                                                    | 1727.9662 | 1727.9457 | 11.8  | 298   | -   | 311  | 0 R.IKPLEQLTLEPYER.D                            |
| 1782.8506                                                                                                                                                                    | 1781.8434 | 1781.8254 | 10.1  | 273   | -   | 288  | 0 K.ANCIDSTVDAETVFAR.E + Propionamide (C)       |
| 1897.0908                                                                                                                                                                    | 1896.0835 | 1896.0693 | 7.50  | 214   | -   | 229  | 1 K.RPNIIPIEDARHPQK.Y                           |
| 2608.3667                                                                                                                                                                    | 2607.3594 | 2607.3843 | -9.52 | 298   | -   | 319  | 1 R.IKPLEQLTLEPYERDHCIVVGR.Y                    |
| 2679.4047                                                                                                                                                                    | 2678.3974 | 2678.4214 | -8.95 | 298   | -   | 319  | 1 R.IKPLEQLTLEPYERDHCIVVGR.Y + Propionamide (C) |
| <b>No match to:</b> 1186.6456, 1255.7002, 1626.8913, 1640.9100, 1742.9920, 1787.8113, 1867.9843, 2025.2024, 2259.1495, 2273.1772, 2344.3313, 2415.2420, 2684.3726, 3877.0421 |           |           |       |       |     |      |                                                 |

# Rp128

## Mass-spectrum:

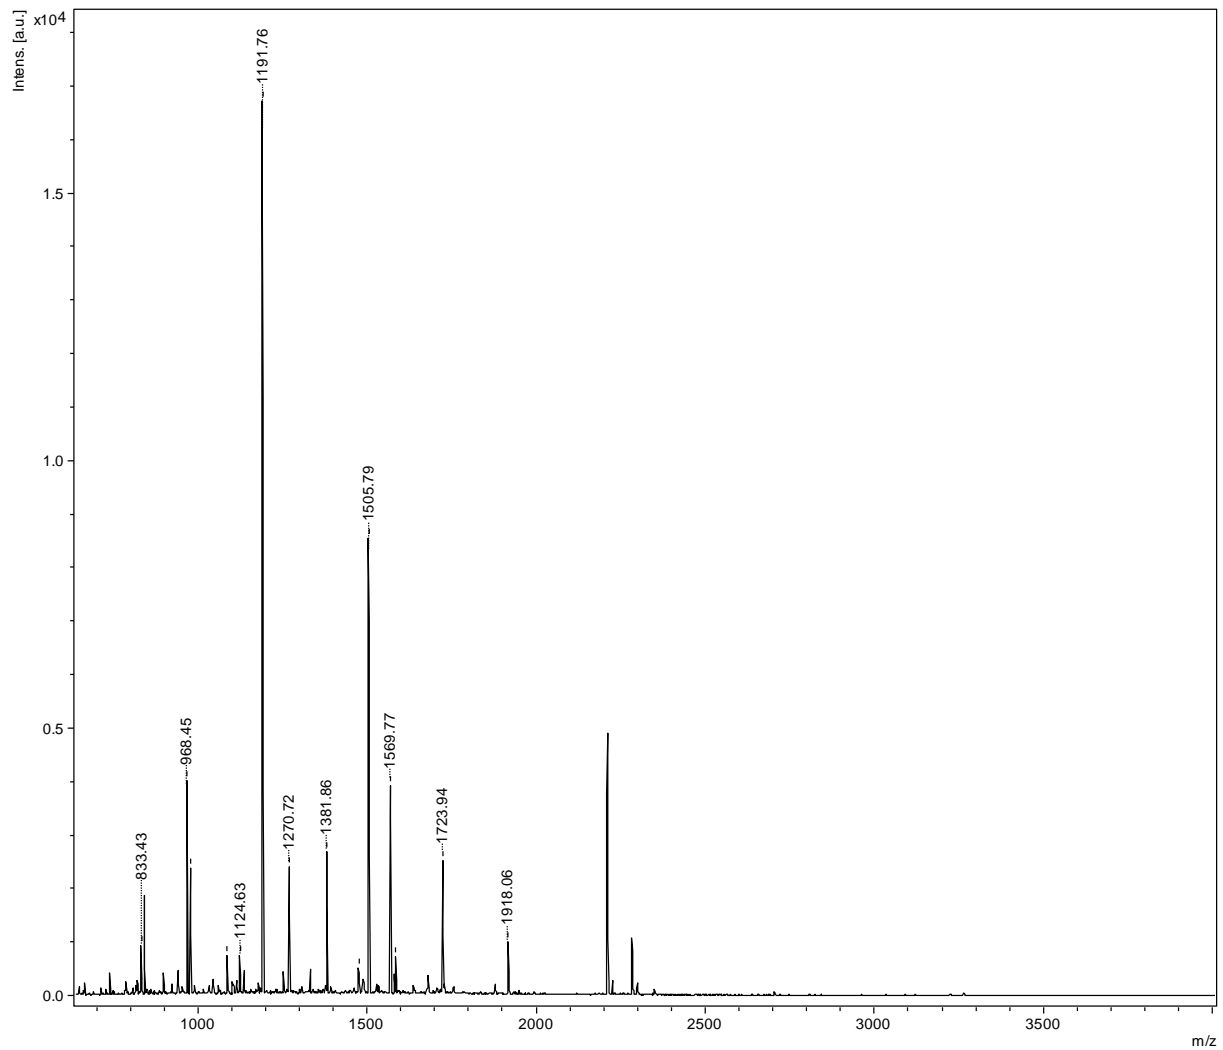

## Identification:

[gi|323305009](#) **Mass: 13056** **Score: 130** **Expect: 3.3e-06** **Matches: 8**

Rp128p [Saccharomyces cerevisiae FostersB]

| Observed  | Mr (expt) | Mr (calc) | ppm    | Start | End | Miss | Peptide                           |
|-----------|-----------|-----------|--------|-------|-----|------|-----------------------------------|
| 968.4534  | 967.4462  | 967.4552  | -9.35  | 15    | 22  | 0    | K.YHPGYFGK.V                      |
| 978.6203  | 977.6131  | 977.6273  | -14.60 | 85    | 93  | 0    | R.IPNVPVIVK.A                     |
| 1191.7578 | 1190.7505 | 1190.7499 | 0.51   | 83    | 93  | 1    | K.GRIPNVPVIVK.A                   |
| 1270.7177 | 1269.7105 | 1269.7081 | 1.87   | 45    | 54  | 1    | K.LWTLIPEDKR.D                    |
| 1505.7904 | 1504.7831 | 1504.7773 | 3.84   | 64    | 78  | 0    | K.ETAPVIDTLAAGYGK.I               |
| 1569.7660 | 1568.7587 | 1568.7446 | 9.01   | 10    | 22  | 1    | R.INMDKYHPGYFGK.V                 |
| 1585.7559 | 1584.7486 | 1584.7395 | 5.76   | 10    | 22  | 1    | R.INMDKYHPGYFGK.V + Oxidation (M) |
| 1723.9376 | 1722.9303 | 1722.9206 | 5.67   | 31    | 44  | 0    | K.QQAHFWKPVLNLDK.L                |

No match to: 833.4252, 1087.5028, 1124.6289, 1381.8616, 1475.7669, 1918.0642

# Rpl3

## Mass-spectrum:

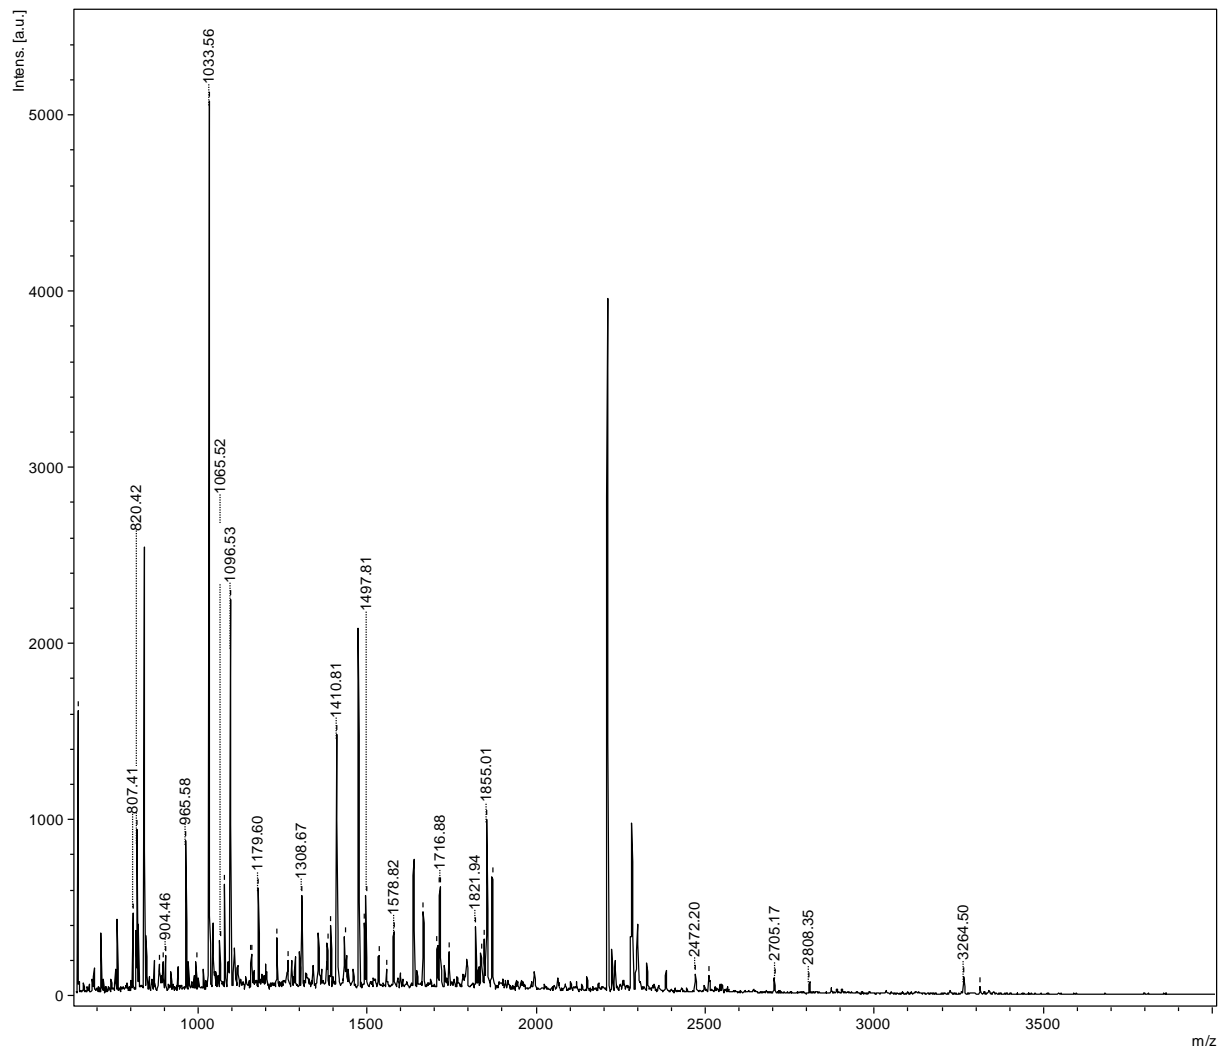

## Identification:

[gi|49258841](#) **Mass: 43599** **Score: 88** **Expect: 0.048** **Matches: 11**

Chain C, Structure Of The Ribosomal 80s-Eef2-Sordarin Complex From Yeast Obtained By Docking Atomic Models For Rna

| Observed  | Mr (expt) | Mr (calc) | ppm    | Start | End | Miss | Peptide |                      |
|-----------|-----------|-----------|--------|-------|-----|------|---------|----------------------|
| 820.4208  | 819.4135  | 819.4127  | 1.04   | 369   | -   | 375  | 0       | R.FQTPAEK.H          |
| 904.4591  | 903.4518  | 903.4637  | -13.08 | 376   | -   | 383  | 0       | K.HAFMGTLK.K         |
| 965.5845  | 964.5772  | 964.5818  | -4.74  | 159   | -   | 166  | 0       | R.VLVHTQIR.K         |
| 1033.5613 | 1032.5540 | 1032.5617 | -7.45  | 10    | -   | 18   | 0       | R.HGHLGFLPR.K        |
| 1079.5137 | 1078.5064 | 1078.5043 | 1.93   | 136   | -   | 145  | 0       | K.YAQDGAGIER.E       |
| 1096.5307 | 1095.5234 | 1095.5210 | 2.20   | 222   | -   | 231  | 0       | K.GHGFEQVTHR.W       |
| 1410.8053 | 1409.7981 | 1409.7918 | 4.42   | 37    | -   | 49   | 0       | R.SKPVALTSFLGYK.A    |
| 1666.8850 | 1665.8777 | 1665.8686 | 5.48   | 175   | -   | 190  | 0       | K.AHLAEIQLNGGSISEK.V |
| 1714.8876 | 1713.8804 | 1713.8574 | 13.4   | 100   | -   | 114  | 0       | R.SLTTVWAEHLSDEVK.R  |
| 1716.8752 | 1715.8680 | 1715.8988 | -18.00 | 50    | -   | 65   | 1       | K.AGMTTIVRDLDRPGSK.F |
| 1870.9867 | 1869.9794 | 1869.9585 | 11.2   | 100   | -   | 115  | 1       | R.SLTTVWAEHLSDEVKR.R |

No match to: 646.3642, 807.4072, 818.4323, 886.4792, 897.4088, 995.5017, 1065.5244, 1157.6073, 1159.5882, 1179.6046, 1234.6902, 1266.6573, 1307.6856, 1383.6930, 1393.7383, 1434.7806, 1475.7813, 1493.7536, 1497.8145, 1534.9156, 1557.7798, 1578.8201, 1638.8194, 1707.8196, 1741.8804, 1821.9360, 1837.9672, 1846.8948, 1855.0084, 2283.1744, 2705.1716, 2808.3529, 3264.5027, 3312.3126

# Rps26

## Mass-spectrum:

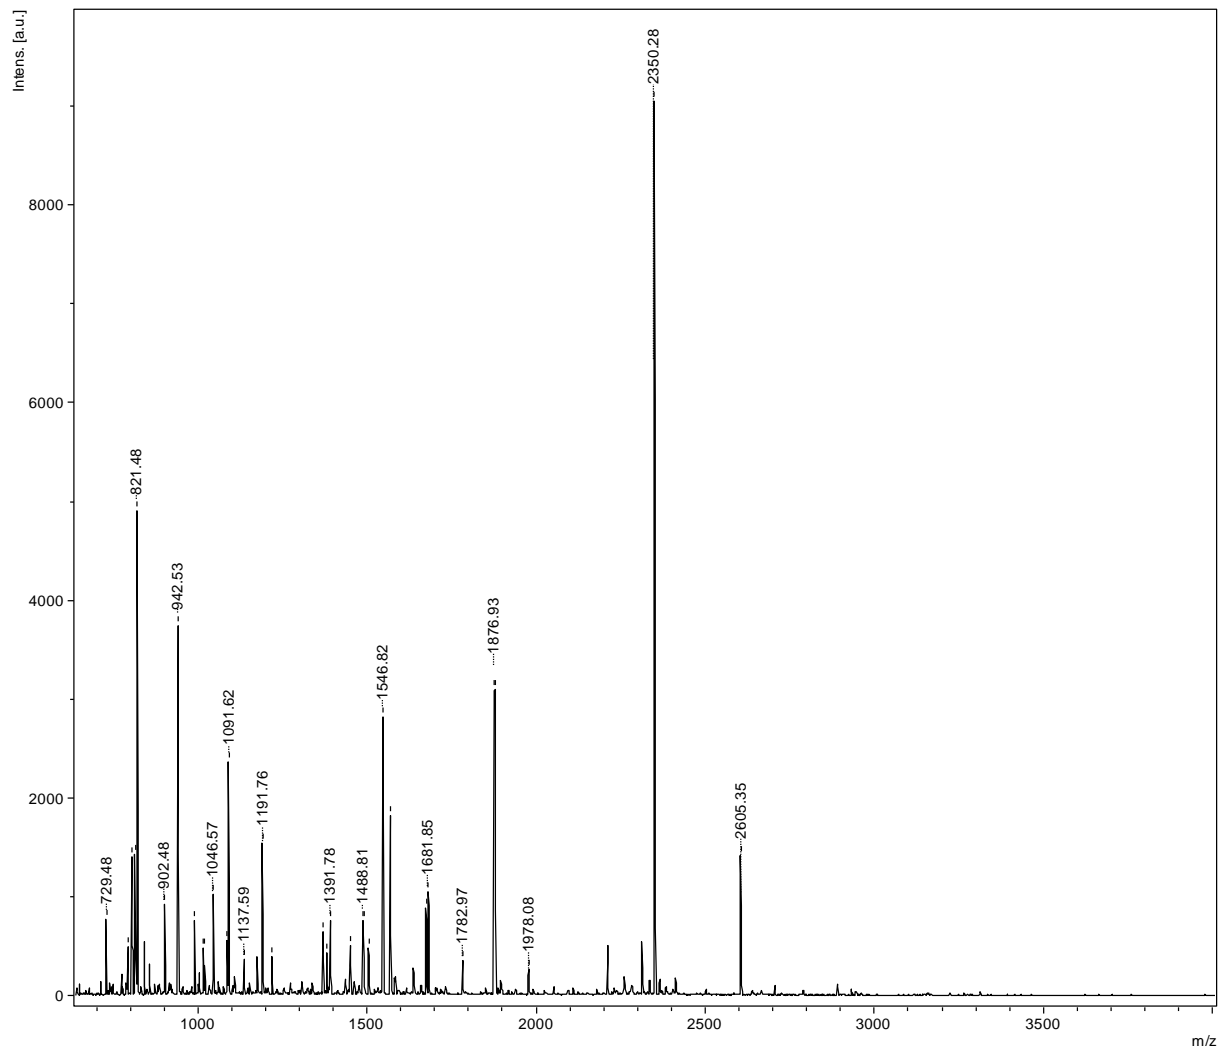

## Identification:

[gi|6320978](#) **Mass: 13438** **Score: 66** **Expect: 0.012** **Matches: 6**

ribosomal 40S subunit protein S26B [*Saccharomyces cerevisiae* S288c]

| Observed  | Mr(expt)  | Mr(calc)  | ppm   | Start | End | Miss | Peptide                      |
|-----------|-----------|-----------|-------|-------|-----|------|------------------------------|
| 792.4864  | 791.4792  | 791.4766  | 3.22  | 16    | 22  | 0    | R.GHVKPVR.C                  |
| 821.4820  | 820.4747  | 820.4668  | 9.67  | 96    | 102 | 0    | R.APPQRPR.F                  |
| 942.5341  | 941.5268  | 941.5294  | -2.79 | 43    | 51  | 0    | R.NIVEAAAVR.D                |
| 1091.6182 | 1090.6109 | 1090.6108 | 0.12  | 94    | 102 | 1    | K.NRAPPQRPR.F                |
| 1681.8467 | 1680.8395 | 1680.8246 | 8.83  | 52    | 66  | 0    | R.DLSEASVYPEYALPK.T          |
| 2605.3516 | 2604.3443 | 2604.3435 | 0.33  | 43    | 66  | 1    | R.NIVEAAAVRDLSEASVYPEYALPK.T |

No match to: 729.4757, 804.2801, 815.4336, 902.4818, 991.5648, 1016.5624, 1020.5810, 1046.5743, 1087.4978, 1137.5905, 1191.7608, 1219.7193, 1370.6568, 1381.8644, 1391.7792, 1451.8177, 1488.8089, 1490.8027, 1505.7911, 1546.8223, 1569.7700, 1674.9161, 1782.9732, 1876.9283, 1878.9926, 1978.0804, 2350.2830

# Sup35

## Mass-spectrum:

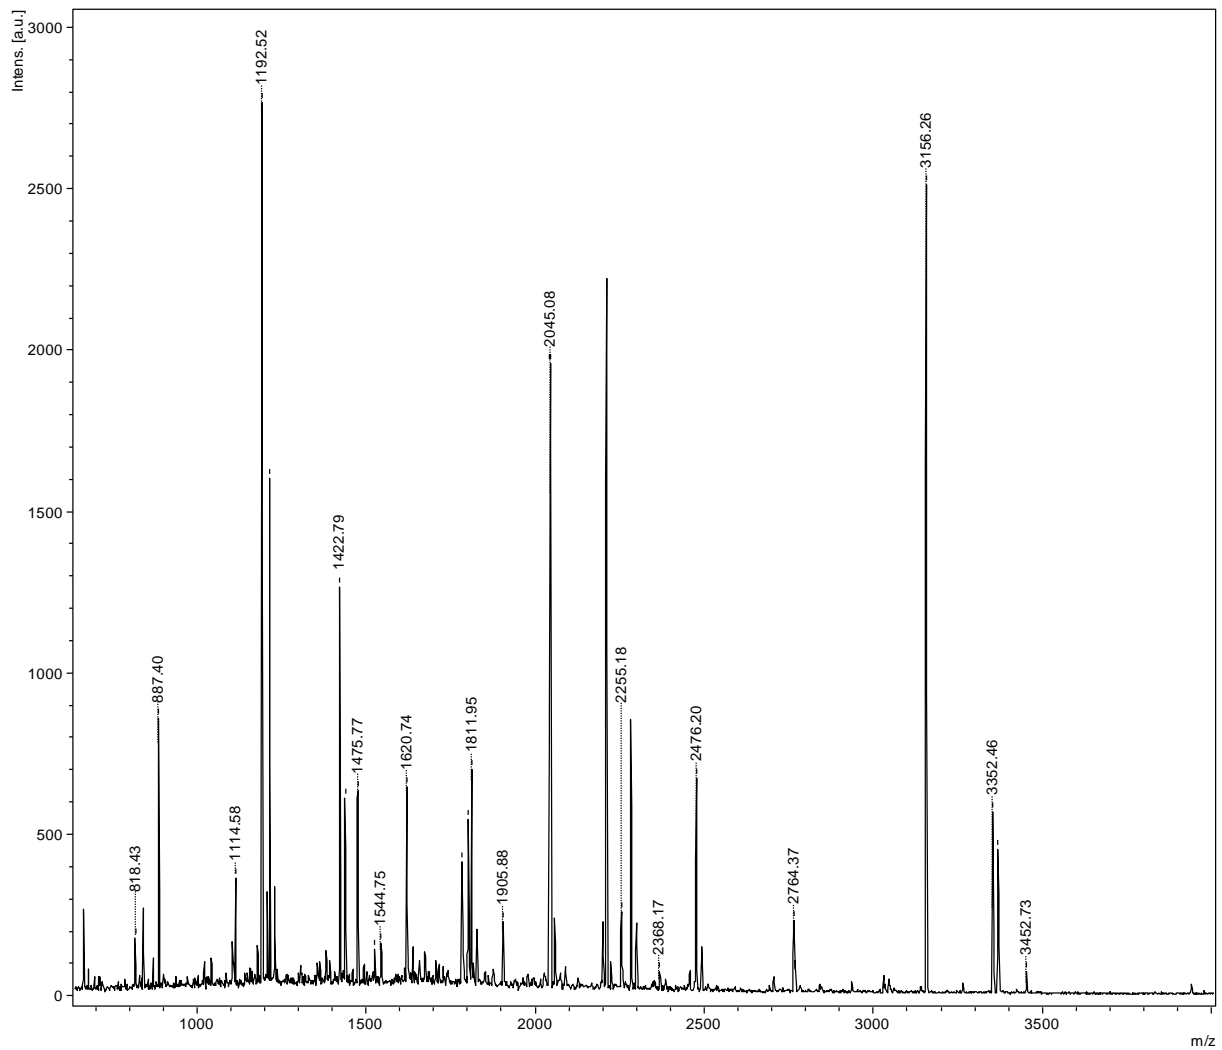

## Identification:

[gi|380005367](#) **Mass: 76535** **Score: 143** **Expect: 1.7e-07** **Matches: 15**

Sup35 [*Saccharomyces cerevisiae*]

| Observed  | Mr(expt)  | Mr(calc)  | ppm    | Start | End | Miss | Peptide                                           |
|-----------|-----------|-----------|--------|-------|-----|------|---------------------------------------------------|
| 887.4042  | 886.3970  | 886.4072  | -11.58 | 331   | 337 | 0    | K.AYFETEK.R                                       |
| 1114.5770 | 1113.5697 | 1113.5818 | -10.87 | 340   | 349 | 0    | R.YTILDAPGHK.M                                    |
| 1192.5249 | 1191.5176 | 1191.5230 | -4.56  | 408   | 417 | 0    | K.MDDPTVNWSK.E                                    |
| 1215.5733 | 1214.5660 | 1214.5567 | 7.62   | 373   | 382 | 1    | R.KGEYETGFER.G                                    |
| 1422.7948 | 1421.7875 | 1421.7853 | 1.56   | 485   | 497 | 0    | R.HINAPFMLPIAAK.M                                 |
| 1438.7819 | 1437.7746 | 1437.7802 | -3.89  | 485   | 497 | 0    | R.HINAPFMLPIAAK.M + Oxidation (M)                 |
| 1784.8919 | 1783.8846 | 1783.8815 | 1.77   | 440   | 456 | 0    | K.TDVVFMVPVSGYSGANLK.D                            |
| 1803.9176 | 1802.9104 | 1802.8938 | 9.17   | 557   | 573 | 0    | K.GVEEEDISPGFVLTSFK.N                             |
| 1811.9488 | 1810.9415 | 1810.9247 | 9.28   | 274   | 290 | 1    | K.STMGGNLLYLTGSVDKR.T                             |
| 2041.9728 | 2040.9655 | 2040.9363 | 14.3   | 305   | 320 | 1    | R.QGWYLSWVMDTNKEER.N                              |
| 2045.0780 | 2044.0708 | 2044.0728 | -1.01  | 555   | 573 | 1    | R.IKGVEEEDISPGFVLTSFK.N                           |
| 2476.1986 | 2475.1913 | 2475.2104 | -7.73  | 440   | 462 | 1    | K.TDVVFMVPVSGYSGANLKDHDVDPK.E                     |
| 2764.3709 | 2763.3637 | 2763.3789 | -5.52  | 642   | 665 | 0    | K.VIAVLETEAPVCVETYQDYPQLGR.F + Propionamide (C)   |
| 3352.4607 | 3351.4535 | 3351.5003 | -13.98 | 103   | 131 | 0    | K.NFNYNLNLQGYQAGFQPQSQGMSLNDFQK.Q                 |
| 3368.4514 | 3367.4441 | 3367.4952 | -15.19 | 103   | 131 | 0    | K.NFNYNLNLQGYQAGFQPQSQGMSLNDFQK.Q + Oxidation (M) |

No match to: 818.4326, 1475.7732, 1620.7421, 1905.8754, 2255.1809, 2283.1695, 3156.2596, 3452.7316

# Tef2

## Mass-spectrum:

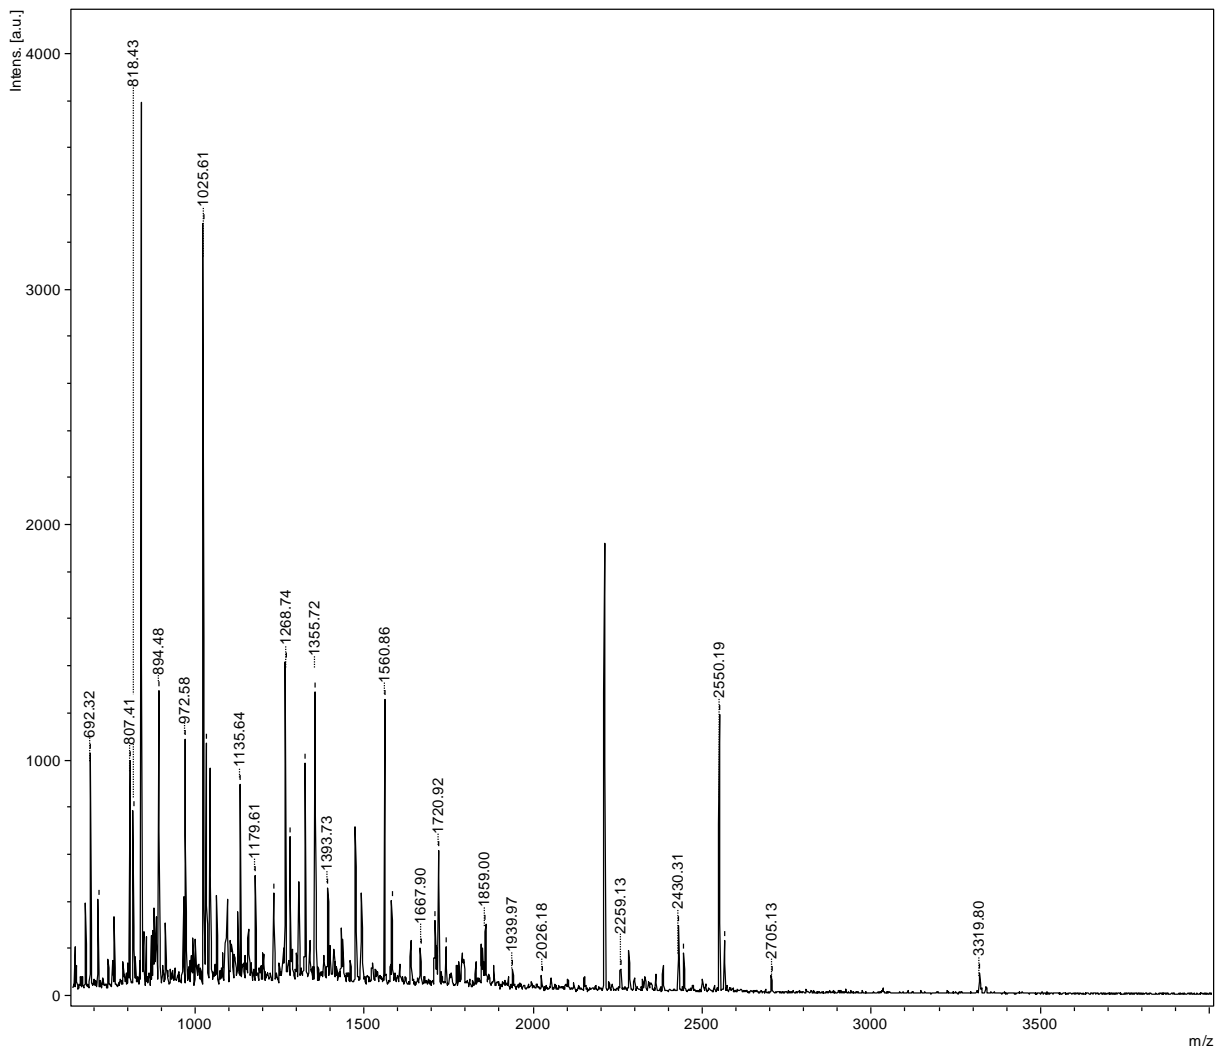

## Identification:

[gi|32563240](#) **Mass: 41199** **Score: 129** **Expect: 4.2e-06** **Matches: 13**

translation elongation factor 1-alpha, partial [Saccharomyces cerevisiae]

| Observed  | Mr (expt) | Mr (calc) | ppm    | Start | End | Miss | Peptide |                                              |
|-----------|-----------|-----------|--------|-------|-----|------|---------|----------------------------------------------|
| 894.4768  | 893.4696  | 893.4647  | 5.44   | 35    | -   | 41   | 0       | K.YAWVLDK.L                                  |
| 1025.6078 | 1024.6005 | 1024.6030 | -2.39  | 233   | -   | 243  | 0       | K.IGGIGTVPVGR.V                              |
| 1033.5497 | 1032.5424 | 1032.5604 | -17.44 | 1     | -   | 9    | 0       | -.TTTGHLYK.C                                 |
| 1135.6393 | 1134.6320 | 1134.6437 | -10.29 | 35    | -   | 43   | 1       | K.YAWVLDK.LK.A                               |
| 1326.7641 | 1325.7568 | 1325.7456 | 8.51   | 114   | -   | 125  | 0       | R.EHALLAFTLGVR.Q                             |
| 1355.7207 | 1354.7134 | 1354.6994 | 10.4   | 64    | -   | 75   | 0       | K.YQVTVIDAPGHR.D                             |
| 1582.8612 | 1581.8540 | 1581.8402 | 8.68   | 144   | -   | 156  | 1       | R.FQEIVKETSNIK.K                             |
| 1858.9964 | 1857.9891 | 1857.9737 | 8.29   | 64    | -   | 79   | 1       | K.YQVTVIDAPGHRDFIK.N                         |
| 2430.3131 | 2429.3059 | 2429.3240 | -7.47  | 244   | -   | 267  | 0       | R.VETGVIKPGMVVTFAPAGVTIEVK.S                 |
| 2446.3118 | 2445.3045 | 2445.3189 | -5.89  | 244   | -   | 267  | 0       | R.VETGVIKPGMVVTFAPAGVTIEVK.S + Oxidation (M) |
| 2550.1884 | 2549.1811 | 2549.1969 | -6.19  | 268   | -   | 290  | 0       | K.SVEMHHEQLEQGVPGDNVGFNVK.N                  |
| 2566.1879 | 2565.1806 | 2565.1918 | -4.38  | 268   | -   | 290  | 0       | K.SVEMHHEQLEQGVPGDNVGFNVK.N + Oxidation (M)  |
| 3319.7959 | 3318.7886 | 3318.8187 | -9.06  | 204   | -   | 232  | 1       | K.TLLEAIDAIEQPSRPTDKPLRLPLQDVYK.I            |

No match to: 692.3229, 715.0093, 807.4135, 818.4307, 972.5791, 1045.5619, 1179.6067, 1234.6817, 1268.7374, 1282.7593, 1307.6861, 1393.7284, 1475.7783, 1493.7553, 1560.8640, 1638.8665, 1710.9555, 1720.9235, 1741.8722, 1939.9736, 2026.1837, 2259.1309, 2705.1257
