# Supplementary material for: Proteomic Screening for Amyloid Proteins
Source: PubMed Central journal article supplement (PMC4280166; doi:10.1371/journal.pone.0116003), 2014-12-30
Supplement: pone.0116003.s005.pdf [file pone.0116003.s005.pdf]

**Table S5.** Identification data of the proteins listed in Table 5.

**Bmh2**

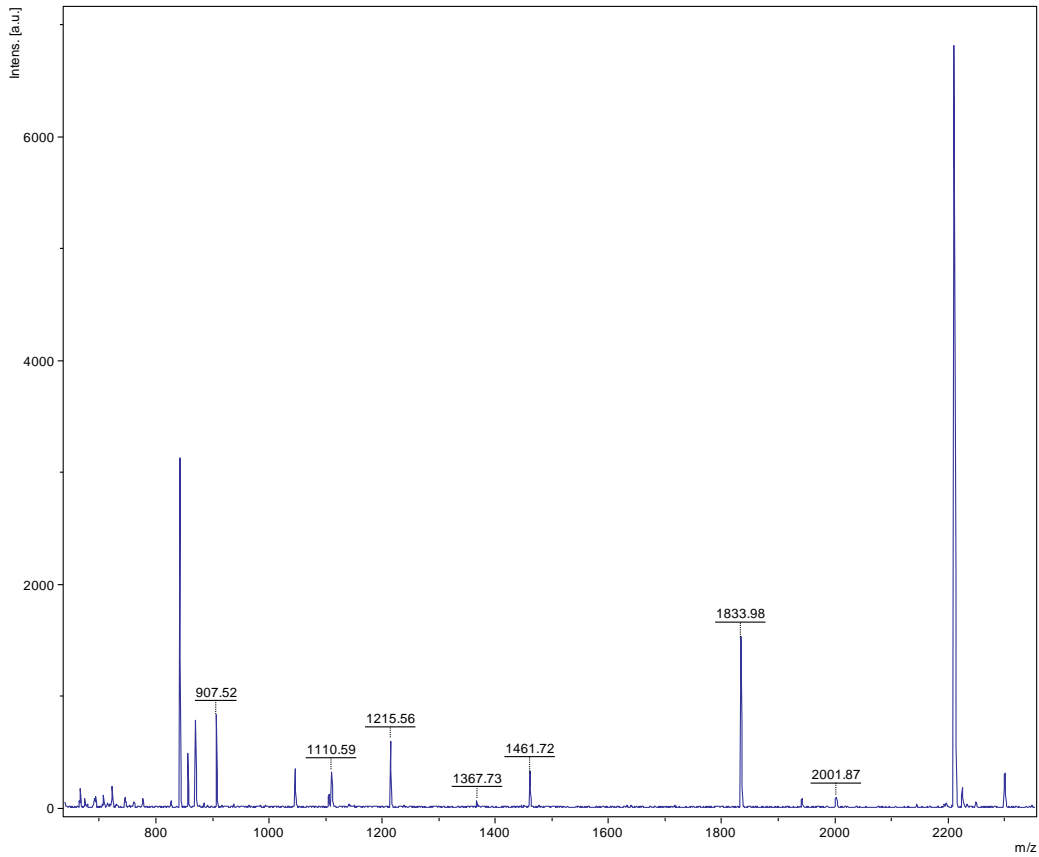

[gi|398365597](#) Mass: 31042 Score: 119 Expect: 3e-05 Matches: 7

Bmh2p [*Saccharomyces cerevisiae* S288c]

| Observed  | Mr (expt) | Mr (calc) | ppm   | Start | End | Miss | Peptide                                |
|-----------|-----------|-----------|-------|-------|-----|------|----------------------------------------|
| 907.5216  | 906.5144  | 906.5174  | -3.40 | 44    | 51  | 0    | R.NLLSVAYK.N                           |
| 1110.5938 | 1109.5865 | 1109.5829 | 3.23  | 77    | 85  | 0    | K.SEHQVELIR.S                          |
| 1215.5612 | 1214.5539 | 1214.5567 | -2.32 | 133   | 143 | 0    | R.YLAEFSSGDAR.E                        |
| 1367.7297 | 1366.7224 | 1366.7204 | 1.42  | 75    | 85  | 1    | K.EKSEHQVELIR.S                        |
| 1461.7239 | 1460.7166 | 1460.7107 | 4.05  | 30    | 43  | 0    | K.AVASSGQELSVEER.N                     |
| 1833.9838 | 1832.9765 | 1832.9632 | 7.28  | 156   | 172 | 0    | K.TASEIATTELPPTHPIR.L                  |
| 2001.8733 | 2000.8660 | 2000.8819 | -7.93 | 14    | 29  | 1    | K.LAEQAERYEEMVENMK.A + 2 Oxidation (M) |

No match to: 1940.9135

# Def1

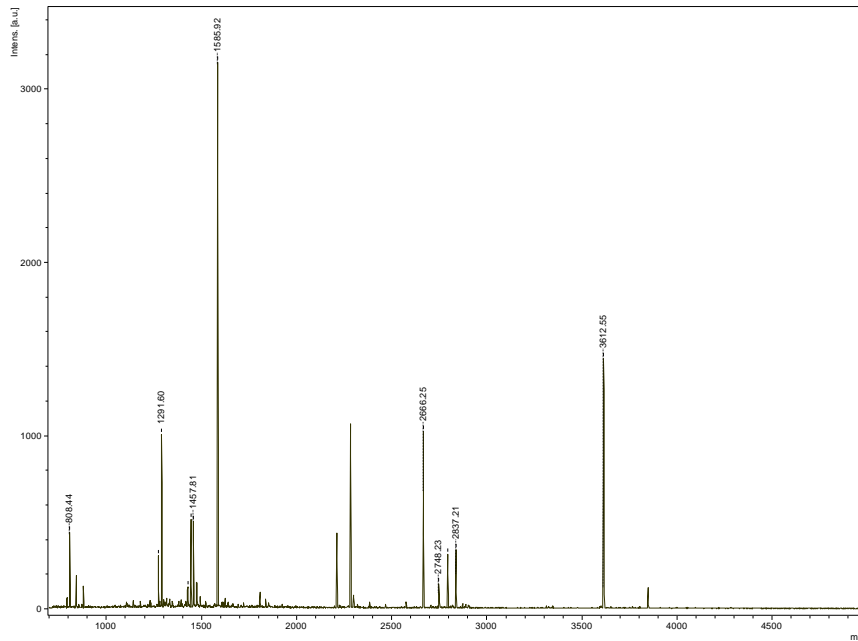

[gi|6322796](#) Mass: 83923 Score: 106 Expect: 0.00057 Matches: 9

Def1p [*Saccharomyces cerevisiae* S288c]

| Observed  | Mr (expt) | Mr (calc) | ppm   | Start | End   | Miss | Peptide                            |
|-----------|-----------|-----------|-------|-------|-------|------|------------------------------------|
| 1273.5876 | 1272.5803 | 1272.5582 | 17.4  | 104   | - 115 | 0    | K.SSNNNSFTSTK.H                    |
| 1291.6026 | 1290.5953 | 1290.5701 | 19.6  | 116   | - 126 | 0    | K.HNSSNYTQAR.N                     |
| 1428.8277 | 1427.8204 | 1427.7959 | 17.2  | 241   | - 253 | 1    | K.KMSWAAIATPKPK.A                  |
| 1444.8256 | 1443.8183 | 1443.7908 | 19.1  | 241   | - 253 | 1    | K.KMSWAAIATPKPK.A + Oxidation (M)  |
| 1457.8148 | 1456.8076 | 1456.7773 | 20.8  | 258   | - 270 | 1    | K.TESPLENVAELKK.E                  |
| 2666.2499 | 2665.2426 | 2665.2408 | 0.68  | 82    | - 103 | 0    | K.EQQHSYVPQQHLNPEDDITYK.S          |
| 2794.3467 | 2793.3394 | 2793.3358 | 1.29  | 81    | - 103 | 1    | K.KEQQHSYVPQQHLNPEDDITYK.S         |
| 2837.2100 | 2836.2028 | 2836.2132 | -3.67 | 172   | - 196 | 0    | K.HDVPQDSNDNNNEEAQQGQQAQEK.N       |
| 3612.5492 | 3611.5419 | 3611.5533 | -3.17 | 631   | - 661 | 0    | K.NNYNYQIQNGQEQQSPNQGVQHSSEDSQQK.Q |

No match to: 808.4375, 1585.9177, 2748.2307

# Pub1

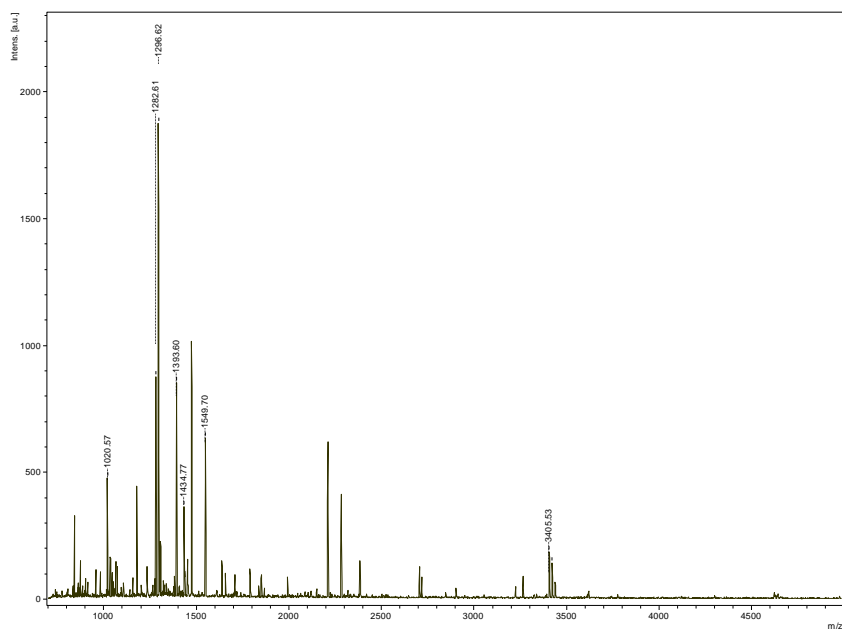

[gi|172438](#) Mass: 47834 Score: 78 Expect: 0.41 Matches: 6

RNA-binding protein [*Saccharomyces cerevisiae*]

| Observed                                 | Mr(expt)  | Mr(calc)  | ppm   | Start | End | Miss | Peptide |                                                     |
|------------------------------------------|-----------|-----------|-------|-------|-----|------|---------|-----------------------------------------------------|
| 1020.5688                                | 1019.5616 | 1019.5651 | -3.51 | 76    | -   | 84   | 0       | R.VLYVGNLDK.A                                       |
| 1393.6021                                | 1392.5948 | 1392.5766 | 13.1  | 242   | -   | 252  | 0       | R.DNNNNNYQQR.R                                      |
| 1434.7750                                | 1433.7677 | 1433.7667 | 0.72  | 93    | -   | 105  | 0       | K.QYFQVGGPIANIK.I                                   |
| 1549.6962                                | 1548.6889 | 1548.6777 | 7.24  | 242   | -   | 253  | 1       | R.DNNNNNYQQR.N                                      |
| 3405.5309                                | 3404.5236 | 3404.5150 | 2.54  | 204   | -   | 234  | 0       | R.GYGFVSFTSQDDAQNAMDSMQGQDLNQRPLR.I                 |
| 3421.5172                                | 3420.5100 | 3420.5099 | 0.01  | 204   | -   | 234  | 0       | R.GYGFVSFTSQDDAQNAMDSMQGQDLNQRPLR.I + Oxidation (M) |
| <b>No match to: 1282.6066, 1296.6220</b> |           |           |       |       |     |      |         |                                                     |

# Rpn10

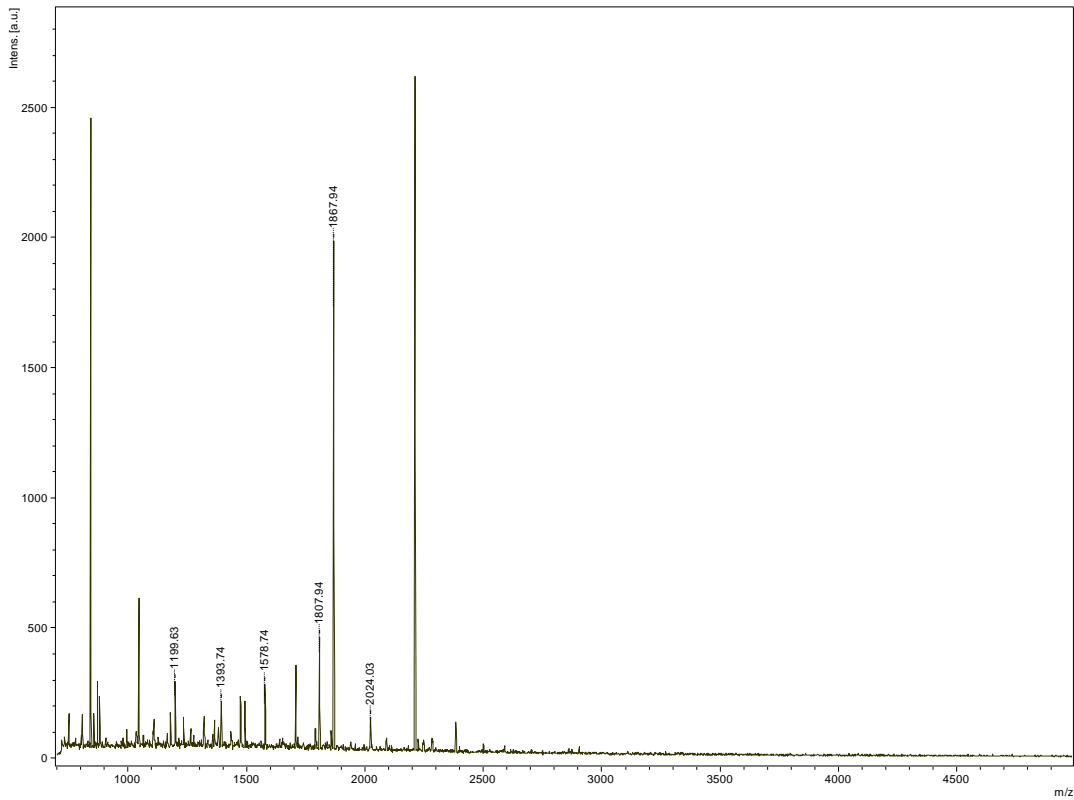

[gi|398365027](#) Mass: 29729 Score: 120 Expect: 2.3e-05 Matches: 6

Rpn10p [*Saccharomyces cerevisiae* S288c]

| Observed  | Mr(expt)  | Mr(calc)  | ppm  | Start | End | Miss | Peptide                          |
|-----------|-----------|-----------|------|-------|-----|------|----------------------------------|
| 1199.6343 | 1198.6270 | 1198.6234 | 2.99 | 61    | 71  | 0    | R.VLSTFTAEFGK.I                  |
| 1393.7411 | 1392.7338 | 1392.7071 | 19.1 | 110   | 122 | 0    | R.IVAFVCSPISDSR.D                |
| 1578.7375 | 1577.7302 | 1577.7103 | 12.6 | 234   | 245 | 1    | R.LSMEEEQQRQER.L + Oxidation (M) |
| 1807.9444 | 1806.9371 | 1806.9363 | 0.43 | 2     | 17  | 0    | M.VLEATVLVIDNSEYSR.N             |
| 1867.9352 | 1866.9279 | 1866.9184 | 5.12 | 42    | 60  | 0    | R.NSNPENTVGLISGAGANPR.V          |
| 2024.0335 | 2023.0262 | 2023.0195 | 3.32 | 41    | 60  | 1    | K.RNSNPENTVGLISGAGANPR.V         |

# Sgt2

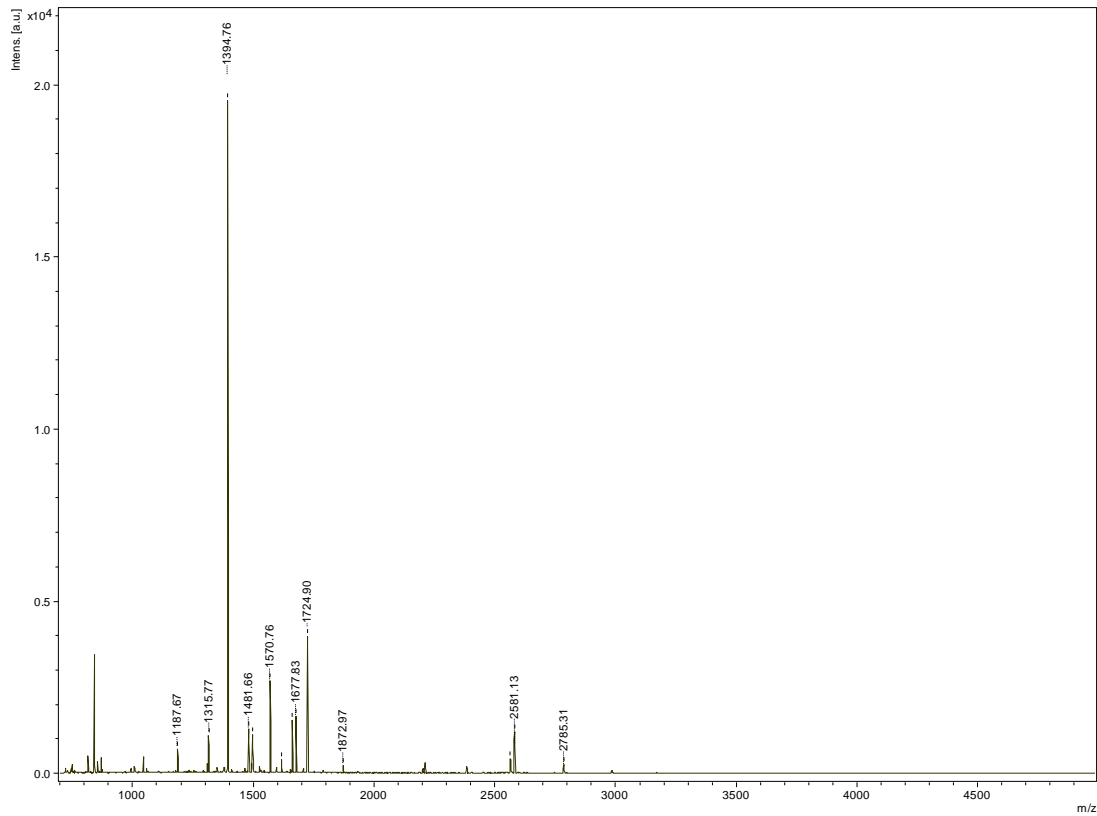

[gi|6324580](#) Mass: 37195 Score: 133 Expect: 1.1e-06 Matches: 11

Sgt2p [Saccharomyces cerevisiae S288c]

| Observed  | Mr (expt) | Mr (calc) | ppm   | Start | End   | Miss | Peptide                                       |
|-----------|-----------|-----------|-------|-------|-------|------|-----------------------------------------------|
| 1187.6736 | 1186.6663 | 1186.6557 | 8.91  | 218   | - 227 | 1    | K.KVEQSLNLEK.T                                |
| 1394.7570 | 1393.7497 | 1393.7354 | 10.3  | 131   | - 142 | 0    | K.VLPTNAIYYANR.A                              |
| 1481.6616 | 1480.6543 | 1480.6472 | 4.79  | 276   | - 288 | 0    | K.MMSNPGAMQNIQK.M + 2 Oxidation (M)           |
| 1497.6569 | 1496.6496 | 1496.6422 | 4.96  | 276   | - 288 | 0    | K.MMSNPGAMQNIQK.M + 3 Oxidation (M)           |
| 1570.7581 | 1569.7508 | 1569.7311 | 12.6  | 158   | - 171 | 0    | K.DAESAISIDPSYFR.G                            |
| 1617.8412 | 1616.8339 | 1616.8158 | 11.2  | 143   | - 157 | 1    | R.AAAHSSLKEYDQAVK.D                           |
| 1661.8358 | 1660.8285 | 1660.8090 | 11.8  | 196   | - 210 | 1    | K.VLDIEGDNATEAMKR.D                           |
| 1677.8299 | 1676.8226 | 1676.8039 | 11.1  | 196   | - 210 | 1    | K.VLDIEGDNATEAMKR.D + Oxidation (M)           |
| 1724.8991 | 1723.8918 | 1723.8780 | 7.98  | 181   | - 195 | 1    | K.YAQKPEEALAYKK.V                             |
| 1872.9711 | 1871.9639 | 1871.9489 | 7.97  | 58    | - 74  | 1    | K.SEFKQHLADILNSASR.V                          |
| 2564.1647 | 2563.1574 | 2563.1795 | -8.61 | 297   | - 321 | 0    | R.QMAEGFASGGGTPNLSDLMNPPALR.N + Oxidation (M) |

No match to: 1315.7692, 2581.1346, 2785.3130

# Sup35

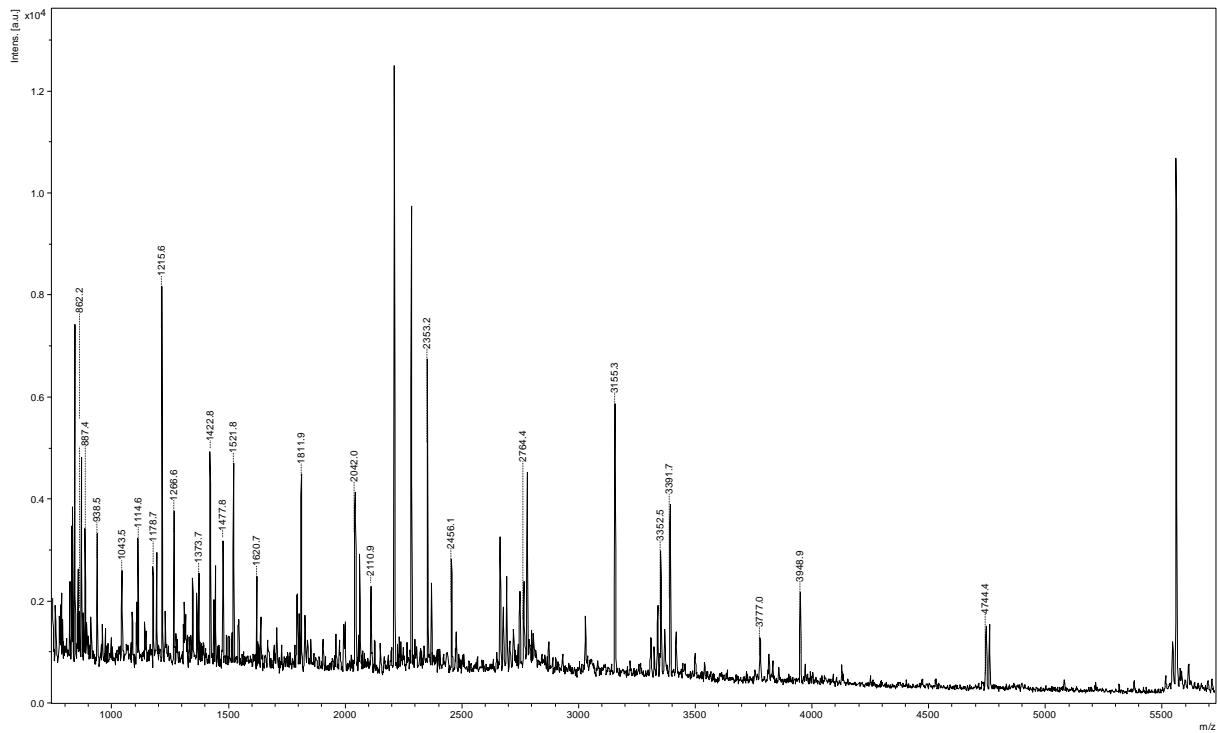

[gi|16304381](#) Mass: 48307 Score: 108 Expect: 0.00054 Matches: 16

Sup35p [*Saccharomyces cerevisiae*]

| Observed  | Mr (expt) | Mr (calc) | ppm    | Start | End   | Miss | Peptide                                                 |
|-----------|-----------|-----------|--------|-------|-------|------|---------------------------------------------------------|
| 887.4207  | 886.4134  | 886.4072  | 6.99   | 329   | - 335 | 0    | K.AYFETEK.R                                             |
| 938.4867  | 937.4794  | 937.4869  | -7.94  | 289   | - 295 | 1    | R.TIEKYER.E                                             |
| 1043.5104 | 1042.5031 | 1042.5083 | -4.98  | 329   | - 336 | 1    | K.AYFETEKR.R                                            |
| 1089.5063 | 1088.4990 | 1088.5350 | -33.00 | 159   | - 168 | 0    | K.VDTKPAESDK.K                                          |
| 1114.5823 | 1113.5750 | 1113.5818 | -6.17  | 338   | - 347 | 0    | R.YTILDAPGHK.M                                          |
| 1178.6672 | 1177.6599 | 1177.6740 | -11.98 | 141   | - 151 | 1    | K.TLKLVSSECIK.L                                         |
| 1192.5354 | 1191.5281 | 1191.5230 | 4.26   | 406   | - 415 | 0    | K.MDDPTVNSK.E                                           |
| 1215.5698 | 1214.5626 | 1214.5567 | 4.79   | 371   | - 380 | 1    | R.KGEYETGFER.G                                          |
| 1422.7893 | 1421.7820 | 1421.7626 | 13.6   | 288   | - 298 | 3    | K.RTIEKYEREA.D                                          |
| 1811.9280 | 1810.9207 | 1810.9247 | -2.20  | 272   | - 288 | 1    | K.SIMGNNLLYLTGSVDKR.T                                   |
| 2041.9514 | 2040.9441 | 2040.9363 | 3.82   | 303   | - 318 | 1    | R.QGWYLSWVMDINKEER.N                                    |
| 2353.1922 | 2352.1849 | 2352.1817 | 1.36   | 348   | - 370 | 0    | K.MYVSEMIGGASQADVGVLVISAR.K                             |
| 2369.1788 | 2368.1716 | 2368.1767 | -2.16  | 348   | - 370 | 0    | K.MYVSEMIGGASQADVGVLVISAR.K + Oxidation (M)             |
| 2456.1294 | 2455.1221 | 2455.1226 | -0.20  | 303   | - 322 | 2    | R.QGWYLSWVMDINKEERNKGK.T                                |
| 3352.4929 | 3351.4856 | 3351.5003 | -4.39  | 101   | - 129 | 0    | K.NFNYNLQGYQAGFPQSQGMSLNDQK.Q                           |
| 3776.9762 | 3775.9689 | 3775.9502 | 4.96   | 336   | - 370 | 3    | K.RRYTILDAPGHKMYVSEMIGGASQADVGVLVISAR.K + Oxidation (M) |

No match to: 862.2412, 1266.5848, 1347.6540, 1366.6686, 1373.6664, 1438.7753, 1444.7279, 1477.7539, 1520.8393, 1521.8022, 1620.7159, 1803.8891, 2062.9518, 2110.9431, 2764.3759, 3155.3018, 3391.7431, 3948.9291, 4744.3942, 4758.4237
